## **Non-random Mating Patterns in Education, Mental, and Somatic Health: A Population Study on Within- and Cross-Trait Associations**

Fartein Ask Torvik, 1, 2, \*, Hans Fredrik Sunde, 1, Rosa Cheesman, 2, Nikolai Haahjem Eftedal, 2,  
Matthew C. Keller, 3, Eivind Ystrom, 2, Espen Moen Eilertsen, 2

### **Affiliations**

1. Centre for Fertility and Health, Norwegian Institute of Public Health, Oslo, Norway
2. PROMENTA Research Center, Department of Psychology, University of Oslo, Oslo, Norway
3. Institute for Behavioral Genetics, University of Colorado Boulder, Boulder, Colorado, USA,

\* Corresponding author: Fartein Ask Torvik, [fartein.ask.torvik@fhi.no](mailto:fartein.ask.torvik@fhi.no)

## ABSTRACT

Partners resemble each other on many traits, such as health and education. The traits are usually studied one by one in data from established couples and with potential participation bias. We studied all Norwegian parents who had their first child between 2016 and 2020 (N=187,926) and the siblings of these parents. We analysed grade point averages (GPA), educational attainment (EA), and medical records with prospective diagnostic data on 10 mental and 10 somatic health conditions measured 10 to 5 years before childbirth. We found stronger partner similarity in mental (median  $r=0.14$ ) than in somatic health conditions (median  $r=0.04$ ), with ubiquitous cross-trait correlations for mental health conditions (median  $r=0.13$ ). GPA correlated 0.43 and EA 0.47 between partners. High GPA or EA was associated with better mental (median  $r=-0.16$ ) and somatic (median  $r=-0.08$ ) health in partners. Elevated correlations for mental health (median  $r=0.25$ ) in established couples indicated convergence. Analyses of data on siblings and in-laws revealed deviations from direct assortment, suggesting instead indirect assortment based on related traits. GPA and EA accounted for 30-40% of the partner correlations in health. This has implications for the distribution of risk factors among children and for studies of intergenerational transmission.

**Keywords:** Assortative mating, educational attainment, mental health, somatic health, cross-trait assortment

## INTRODUCTION

Assortative mating, the non-random matching of partners, is commonly studied from the perspective of social inequalities. Strong assortment for educational attainment (EA) is well-documented across disciplines <sup>1</sup>, and partners often resemble each other in mental and somatic health conditions <sup>2,3</sup>. Recently, there has been a revived interest in matching across traits <sup>4</sup>. This is important, because people do not choose their partners based on one phenotype at a time but holistically. We build upon the well-established links between educational attainment and health <sup>5,6</sup> and investigate assortative mating patterns within and between these interconnected phenomena in population-wide data. This provides insight into the clustering of different disadvantages within families.

A comprehensive catalogue of partner correlations, based on the UK Biobank, provides insight into partner similarity in 133 phenotypes, including EA and symptoms of mental disorders <sup>1</sup>. However, previous studies are with few exceptions <sup>2</sup> limited to cohort samples with healthy volunteer selection bias <sup>7</sup>. Issues related to selective non-participation are amplified in studies of couples, as both partners need to participate. In addition, partner correlations are usually assessed at arbitrary relationship stages and may therefore reflect convergence in addition to initial matching, leaving it unclear to what degree mental health determines couple formation. Another line of research investigates correlations between partners' genetic risk for mental disorders. Assortment based on heritable mental health should lead to genetic correlations between partners, and since the genes are determined before the couples are formed, correlations should be independent of convergence. Such studies report null-findings for mental disorders <sup>8,9</sup>, except for schizophrenia <sup>10</sup>. Such findings could imply that mental health does not influence partner selection. Despite a century of research on assortative mating, it is still questioned whether there is "really assortative mating on the liability to psychiatric disorders" <sup>11</sup>. Even less is known about assortment for somatic health. Good somatic health is a desired trait in partners <sup>12</sup>, but it is unclear how similar partners are in somatic compared

to mental health. Our first aim was therefore to assess partner similarity in education and mental and somatic health using population-wide prospective data.

Cross-trait assortment refers to non-random matching across different traits between the two partners<sup>13</sup>. Due to the competition for mates and attractiveness trade-offs, one should expect partner correlations to arise across traits related to attractiveness, such as between income and body mass<sup>14</sup>. Assortment across traits can lead to correlations between genetic<sup>4</sup> and environments influences on different traits<sup>15</sup>, which in turn can contribute to familial clustering of misfortunes<sup>16</sup>. The genetic research has primarily focused on cross-trait assortment as a source of genetic correlations<sup>4,17</sup>, and the econometric research on partner choice trade-offs<sup>14,18</sup>. However, neither has examined cross-trait assortment for education and a broad selection of health phenotypes in representative samples. Addressing this gap, our second aim was to determine the degree of cross-trait assortment for various health conditions.

Partner similarity can arise from several processes. First, *direct assortment* (or *primary phenotypic assortment*) means that partners resemble each other in a trait because the observed trait influences partner selection. Direct assortment is a sufficient explanation for partner similarity in height<sup>19–21</sup>. Second, *indirect assortment* (also called *secondary assortment*) refers to similarity in a trait resulting from selection on a correlated trait. This could be, for instance, psychiatric vulnerability for mental disorders or traits that are observed with measurement error<sup>19</sup>. Third, *social stratification* (or *social homogamy*) refers to individuals selecting each other based on environmental proximity, which incidentally make them similar in the phenotype of interest. Social stratification has been found to play a small to moderate role in partner similarity in EA<sup>22–24</sup>. Fourth, *convergence* refers to partners becoming more similar over time, as has been found for lifestyle choices such as alcohol consumption and exercise<sup>25</sup>. Combinations and further subdivisions of these mechanisms are possible<sup>26,27</sup>.

Assortative mating can bias genetic and intergenerational studies<sup>16,20</sup>, with each mechanism having different genetic and environmental consequences. The optimal adjustment for assortative mating depends on the underlying process, which is often unknown. Direct assortment is typically assumed, although several studies have found deviations from direct assortment for EA<sup>19,20,24</sup> and one study found deviations from direct assortment in 29 of 51 studied traits<sup>28</sup>. We have previously shown that adding siblings data can inform on mechanisms<sup>19</sup>. Our third aim was therefore to determine whether partner resemblance across a range of health phenotypes is consistent with direct assortment.

Assortative mating related to EA could be particularly important. EA relates to most health conditions and has higher partner similarity than most other traits<sup>1,29</sup>. Assortative mating based on EA could lead to partner similarity in health phenotypes due to indirect assortment. Assortment based on EA is also a potential explanation for cross-trait correlations between different health conditions, when both conditions are related to EA. However, final EA is often not obtained until after a couple meet. Therefore, assortment may not take place on EA itself, but its precursors. Therefore, we here additionally use grade point average (GPA) at age 16 as an early precursor of EA. Our fourth aim was to determine to what degree assortment on health phenotypes is indirect via assortment on EA or its early indicator, GPA.

In summary, we analysed educational and medical records for the parents of all first-born children born between 2016 and 2020 to parents living in Norway. Our approach had four key advantages: Population-wide data with no participation bias, early assessment, comprehensive phenotyping, and data from siblings as well as partners. First, we studied partner similarity on EA, mental, and somatic health conditions. To limit the role of convergence, we observed health 10 to 5 years before couples had their first child. We found positive partner correlations for all conditions, which were higher for mental than for somatic health conditions. Correlations in established couples were higher,

indicating convergence. Second, we found widespread cross-trait assortment between education in one partner and mental health in the other and widespread assortment across different mental health conditions. Third, by analysing correlations among siblings and siblings-in-law, we found frequent statistically significant deviations from direct assortment. Fourth, we explored whether partner resemblance in health could be explained by assortment on GPA or EA. Adjusting for both partners' GPA or EA reduced correlations in health with 30-40%.

## RESULTS

### Descriptive statistics

Our study was based on the complete Population Register of Norway. We defined as partners all pairs of opposite-sex individuals registered as parents for the first time between 2016 and 2020 (187,926 individuals in 93,963 couples). We examined 10 mental and 10 somatic health conditions in primary care records. These were measured 5 to 10 years before a couple had their first child to minimize effects of convergence. GPA was observed at age 16 and EA at age 30 or in 2020 for younger individuals.

Table 1 presents the prevalence of the mental and somatic health conditions, as well as conditional prevalence rates among relatives of affected individuals. Partners, siblings, and in-laws of affected individual generally had heightened risks of having the same conditions. Figure 1 illustrates these prevalence rates among females and males with unaffected and affected partners. Those with an affected partner were more likely to have the condition themselves, although the strength of this association varied considerably by condition. The within-individual correlations for the educational outcomes and the 20 health conditions are presented in Supplemental Figure S1. Mental health conditions exhibited stronger inter-correlations and also demonstrated larger associations with education than did the somatic health conditions. Within-person associations from logistic regression analyses are presented as odds ratios in Supplemental Figure S4.

### Mental health shows stronger correlations between partners than somatic health

Figure 2 shows in dark blue the partner correlations in educational outcomes and 20 health phenotypes (10 mental and 10 somatic) observed 5 to 10 years prior to the couple's first child. This prospective analysis revealed positive partner correlations for all the included traits, ranging from 0.02 (allergic rhinitis) to 0.56 (substance use disorder). For 20 of the 22 traits, partner correlations were statistically significant at the  $\alpha=0.05$  level. Notably, all the mental health conditions had higher partner correlations than all the somatic health conditions. The median partner correlation was 0.14 for mental health conditions and 0.04 for somatic health conditions. GPA correlated 0.43 and EA correlated 0.47 between partners.

### Cross-sectional assessment yields higher within-trait correlations

To address the potential impact of convergence, we also conducted a cross-sectional analysis of the 10 mental and 10 somatic health conditions from 2015 to 2019, when most of the couples were likely already established. These cross-sectional analyses disregard the timing of childbirth. Figure 2 contrasts these cross-sectional correlations (shown in deep red) with the prospective correlations. The correlations between partners' mental health conditions increased notably from a median of 0.14 in prospective analyses to a median correlation of 0.25 in cross-sectional analyses. For somatic health conditions, the increases were more modest, from 0.04 to 0.06. All partner correlations were statistically significant at the  $\alpha=0.05$  level. Supplemental Tables S2-S3 and Supplemental Figures S6-S11 provide complete results for the cross-sectional assessment.

### Partner correlations are ubiquitous across different mental health conditions

Returning to the prospective analyses, we investigated partner correlations across educational, mental, and somatic phenotypes. Figure 3 illustrates the partners correlations within and across all 22 phenotypes, whereas Table 2 summarises median correlations for different categories of

phenotypes. EA and GPA correlated 0.66 within individuals, implying that 56% of the variance in EA was not shared with GPA. Yet, the associations of either GPA or EA with health conditions were remarkably similar. Higher GPA or EA was generally associated with a reduced risk of most health conditions in the partner, except for acne, allergic rhinitis, and naevus/mole which had negligible associations in the other direction. These conditions were also related to higher education or better grades within individuals (see Supplemental Figure S1).

The median correlations between education and mental health conditions in the partner was -0.16 to -0.17, depending on sex and the educational outcome. All mental health conditions were associated with all other mental health conditions in the partner, indicating widespread cross-trait assortment. The median partner correlation across different mental health conditions was 0.13, close to the within-phenotype correlation of 0.14. In contrast, most somatic conditions showed little to no relation to mental health conditions in partners, with a few exceptions (median correlation 0.03), and the cross-trait correlation for somatic conditions was minimal with a median at 0.01. Table 2 presents median correlations within and between different phenotype categories for the cross-sectional analyses. In the cross-sectional analyses, most cross-trait correlations were marginally higher, between 0.01 to 0.03, compared to the prospective analyses. Supplemental Figure S5 presents the within and across trait associations as odds ratios. Results were similar to the correlation analyses and indicated widespread cross-trait associations for educational outcomes and mental health conditions.

#### Siblings-in-law correlate higher than expected under direct assortment

We then explored whether the partner correlations were in line with direct assortment on the observed traits. Under direct assortment, the correlation between indirectly related individuals, such as siblings-in-law, should equate the product of the correlations that connect them, in this case



partners and siblings. Among the 187,926 parents in our sample, 156,335 had a sibling, resulting in an equal number of sibling-in-law observations.

Table 3 presents the correlations for partners, siblings, and siblings-in-law in the 22 traits. Partners were significantly correlated on 21 traits, siblings on all 22, and in-laws on 17. Partners were more similar in EA than in GPA, whereas siblings showed the greatest similarity in GPA. Table 3 also presents the ‘in-law inflation factor’, which compares the observed in-law correlations to those predicted by sibling and partner correlations under direct assortment. It was calculated by dividing the observed correlations between siblings-in-law by the product of the sibling and partner correlations. This was above 1.00 for 20 of 22 phenotypes, with statistically significant deviations from direct assortment at the  $\alpha=0.05$  level for GPA, EA, 3 mental health conditions, and 5 somatic health conditions, indicating that direct assortment cannot account for the observed correlations. Logistic regression presented in Supplemental Table S1 indicated independent associations with siblings-in-law for the two educational outcomes, 5 mental and 4 somatic health conditions, after accounting for partner associations. This concurs with deviations from direct assortment.

#### Indirect assortment on health via assortment on educational attainment

We proceeded to test whether assortment on GPA or EA could drive partner similarity in health. Figure 2 shows the residual partner correlations after adjustments for GPA (in base blue) or EA (in bright blue). The partner correlation in EA adjusted for GPA was twice as strong ( $r=0.29$ ) as the partner correlation in GPA adjusted for EA ( $r=0.15$ ), suggesting that EA is more strongly related to assortment than GPA is. For mental disorders, the median partner correlations were reduced from 0.14 to 0.11 after adjustment for GPA (down 21.6%) and to 0.10 after EA adjustment (down 31.0%). The median partner correlation for somatic disorders was already low at 0.04, and remained at 0.04

(down 12.0%) after adjustment for GPA and was reduced to 0.03 (down 29.1%) after adjustment for EA.

Assortment on GPA or EA could also influence cross-trait partner correlations. The median partner correlation between different mental health conditions was reduced from 0.13 to 0.08 (down 32.2%) after adjustment for GPA and to 0.07 after adjustment for EA (down 41.1%). The median partner correlation between different somatic disorders was stable at 0.01. Table 2 summarizes the median correlations and Supplemental Figures S2 and S3 provide the complete correlation matrices after adjustment for GPA and EA, respectively.

## **DISCUSSION**

Studying the complete set of first-time Norwegian parents, we found positive partner correlations in GPA, EA, and all analysed mental and somatic health conditions, observed from 10 to 5 years before the birth of a couple's first child. The initial similarity and later convergence were larger for mental than somatic health conditions. We also observed ubiquitous cross-trait correlations for mental health conditions, which in prospective analyses were approximately as large as the within-trait correlations. The pattern of correlations between relatives indicated deviations from direct assortment on several of the observed phenotypes. Although partner correlations could be partially explained as by-products of assortment related to education, this was not a primary explanation of partner correlations in mental health.

### **Mental health in early adulthood influences partner selection**

Our study expands on previous research by including the whole population, studying diagnosed health conditions, and contrasting the importance of mental versus somatic health conditions. To minimize the influence of convergence, we examined young adults before parenthood and typically before partnership formation. As far as we are aware, partner resemblance in mental health

assessed before couple formation has previously only been found for self-reported symptoms in a cohort study<sup>30</sup>. Our prospective analyses and use of proper diagnoses indicate that there is assortment on the liability to mental disorders, as questioned by Yengo<sup>11</sup>. The lack of correlations between partners' polygenic indices in previous studies is likely due to limited discovery samples and small effects of each causal variant, giving the polygenic indices low predictive value for mental health conditions. Our study indicated that mental health conditions were more important than somatic health conditions for partner selection. This is not surprising, given that mental health is linked with marriage and fertility<sup>31</sup> and could indicate desirability to potential partners.

Partner correlations in mental health were considerably higher at the end than at the start of the observational period. This highlights that studies on established couples can typically inform on correlations, and that convergence needs to be addressed before interpreting correlations as indicative of assortment<sup>2,17</sup>. This increase does not necessarily reflect mutual influences; it could also be that partner selection is based on vulnerabilities to mental disorders that manifest as diagnosable conditions later in life (indirect assortment). We observed change in resemblance from 10 to 5 years before childbirth until the years surrounding childbirth in the same couples – the convergence may be more pronounced among older couples.

### **Assortment across mental health conditions is ubiquitous**

The cross-trait correlations for different mental health conditions in the two partners were almost as strong as within-trait correlations (median  $r=0.14$  vs  $0.13$ ). Hence, individuals tend to mate with partners who share similarly good or poor mental health, with the specific type of health condition being subordinate. Such results align with assortment on perceived attractiveness, itself influenced a both mental and educational traits. Thus, the partner correlations observed across different traits likely reflect indirect assortment. Understanding the nature of the active sorting factor is an important question for future studies. It might be more strongly related to general vulnerability to

psychopathology<sup>32</sup> than to specific disorders. Future studies may explore whether partner resemblance across many traits can be parsimoniously explained by assortment on one or a small number of dimensions. Our results differ from a study that found assortment primarily on symptoms of specific disorders<sup>9</sup>. However, that study used data on established couples, which, according to our results, have increases in within-trait correlations.

Individuals with better grades or higher education were less likely to have partners with mental and somatic health conditions. This suggests a trade-off between different attractive traits in partners, indicating competition for healthy partners rather than matching on similarity. Nevertheless, the remarkably high correlation for substance use disorder could indicate genuinely different lifestyle preferences. There was little assortment across different somatic conditions or across mental and somatic conditions. Still, most correlations were positive, and mostly so among those involving various types of pain, possibly reflecting the mental aspect of pain. The correlational patterns between partners could enhance negative consequences for children, who may experience both low educational levels and poor mental health in their parents, which may both affect children's outcomes<sup>33,34</sup>.

### **Partner correlations are generally inconsistent with direct assortment**

When accounting for assortative mating to avoid bias, studies make assumptions about the mechanisms involved. Typically, they assume direct assortment on the studied variables<sup>35,36</sup>. Our results challenge this notion. The siblings-in-law correlations exceeded those expected under direct assortment, suggesting that direct assortment is not a sufficient explanation for partner resemblance and that studies relying on this assumption can be biased. Deviations from direct assortment has previously been reported for EA<sup>19,23,24,37</sup>. We extended this observation to GPA and a range of health conditions. Our results align with another study that observed deviations from direct assortment in 29 of 51 traits<sup>28</sup>, mainly different traits than those studied here. Although the phenotypic model

could be falsified, the underlying mechanisms remain elusive. Both indirect assortment and social stratification<sup>26</sup> could increase in-law correlations disproportionately and explain our observations. Measurement error is one source of indirect assortment, where individuals chose each other based on the true values of traits, which are imperfectly measured. As measurement error is widespread and relatively easy to estimate, accounting for measurement error could improve future studies on assortment. Moreover, assortment leads to correlations between all genetic and environmental influences in one partner and those in the other. Intergenerational studies therefore need to carefully model indirect assortment not only within, but also across traits. Regardless of mechanism and possible genetic consequences of assortative mating<sup>16</sup>, the potential social consequences of partnership composition could remain.

### **Assortment on educational attainment partially explains health similarity**

Given the known correlation between education and health status, one should expect a partner with higher education to, on average, also enjoy better health. Indeed, when we adjusted for both partners' GPA or EA, partner correlations within and across mental disorders were reduced. Hence, similarity in mental health could to some degree be by-products of on education or its precursors. Nevertheless, correlations within and across mental disorders remained significant, indicating that these were not solely by-products of assortment based on education. Hence, mental health appears to be a separate factor in partner selection. Partner correlations within and across different somatic health conditions were close to zero both before and after these adjustments.

It must be noted that EA was not measured prospectively; at the young age of approximately 20 years, many individuals are yet to obtain their highest education. Individuals can select partners based on the traits that exist at this age and that lead to later EA, in which case the adjustment is defensible. However, it is also possible that the adjustment for EA is an overadjustment because one's own or the partner's health could influence educational ambitions. Using GPA as an alternative

indicator of educational potential circumvented this issue. GPA was somewhat less strongly linked to the partner's health. This could suggest that traits that influence EA are more important for mate choice than traits influencing GPA. Interestingly, siblings were more similar in GPA than EA, but this was reversed in partners. Cognitive abilities and conscientiousness influence both GPA and EA, but there could be differences in ambitions, achieved status, or social background. Roughly half of the variance in EA was not shared with GPA, indicating that there are important differences between the two. The current study indicates, as do also previous studies<sup>19,24</sup>, that the strong partner resemblance in EA is due to even stronger resemblance in an unobserved factor. This was also the case for GPA. Future studies should aim identify traits that account for the sorting process and understand how it relates to partner similarity across observed traits.

### **Limitations**

This study has some limitations that one should consider when interpreting the findings. First, the medical records are a proxy for actual health conditions, as not all individuals with health issues seek medical care. Nevertheless, the use of primary care data captures a larger proportion of cases than specialist care alone<sup>38</sup>, mitigating potential biases. Second, our focus on parents of children born in Norway between 2016 and 2020 could limit the generalizability to other populations or time periods. Third, we cannot rule out that some partners had already influenced each other at the start of the observational period in early adulthood. Nevertheless, the prospective nature of our study is a major advancement over previous studies, and the comparison with cross-sectional data emphasizes the impact of this analytic decision. The gap of 5 years between the end of health observation and the birth of the first child exceeds the median duration of relationships, suggesting that most couples were unacquainted during the health observation period. Fourth, we used tetrachoric correlations, based on the assumption of an underlying normally distributed liability. Whereas this could be reasonable for mental health conditions, some somatic health conditions are binary in their nature, such as fractures. This could lead to an over-estimation of partner correlations. However, these

disorders were included primarily as comparisons, which, if anything, would make the difference between mental and somatic health conditions larger. In addition, this did not affect the tests of direct assortment (Supplemental Scripts S1-S2), and results were consistent in logistic regression.

## **Conclusion**

In conclusion, this study provides evidence for assortative mating patterns across GPA, EA, and 20 health conditions, up to 10 years before partners had their first child in data without participation bias. Among the health conditions, mental health conditions were particularly important for partner selection. We observed vast cross-trait assortment for mental health conditions, indicating that individuals match on overall mental health, rather than on specific health conditions. The link with education might indicate trade-offs for overall attractiveness. This could have consequences for the distribution of risk factors among children. In general, partner resemblance could not be explained with direct assortment, however, GPA or EA could only to a moderate degree account for partner similarity in mental health. The use of prospective data ensured that partner resemblance was not merely due to convergence, and the comparison with cross-sectional data indicates that studies without prospective data do not precisely reflect assortative mating. Indirect assortment appears the best explanation for partner similarity, raising important questions on mate choice and complicating modelling of partner similarity.

## **METHODS**

### Sample and design

The Population Register of Norway consisted of 8,589,458 individuals born between 1855 and 2020 who were alive and living in Norway after 1964. We combined this with information on publicly funded health care, available from 2006 to 2019. We defined a couple as the two registered parents of a child and studied all opposite-sex parent-pairs who had their first child born between 2016 and 2020. This led to observation of 93,963 couples and 187,926 parents. Only opposite-sex parents were

included in the sample, as partner similarity in same-sex couples warrants separate studies. We included only couples who were both registered as living in Norway for the 10 to 5 years prior to the child's birth. For each parent, we drew a random full-sibling. Among the 187,926 parents, 156,335 had a sibling, hence, we also had data on an equal number of pairs of siblings-in-law. In 65,902 cases, both partners had siblings.

We observed health of the parents from 10 to 5 years prior to the birth of their child. For instance, for a child born in January 2016, we observed health from January 2006 to December 2010, whereas for a child born in December 2020, we observed health from December 2010 to November 2015. The five-year lag between health observations of parents and the child's birth was intended to limit the influence of convergence on the results, by measuring them early in the relationship. Although some parents will have known each for longer, the duration of the sexual relationships with the father before the first pregnancy had a median of 4 years (first quartile: 2 years; third quartile: 6 years) among 31,651 mothers in the Norwegian Mother, Father, and Child Cohort Study (original data analyses, a general description of the sample has been provided previously<sup>39</sup>). To study convergence, we additionally observed health in the last five years available, from 2015 to 2019 for all couples regardless of when they had their first child. This is around the time they had their first child. The mean birth year was 1988 for mothers and 1986 for fathers. Mothers were on average 29.61 and fathers 31.96 years old when they had their first child (19.61 and 21.96 at the start of the observational period).

### Ethics

The study was approved by The Regional Committees for Medical and Health Research Ethics, Southern and Eastern Norway (project #2018/434).



## Measures

### *Educational attainment*

Educational attainment was available in eight categories, ranging from “no education” to “Ph.D.”, coded according to the Norwegian Classification of Education. We used educational attainment at age 30 or the highest educational attainment at the end of the observational period as a continuous variable after recoding it into years of completed education.

### *Grade point average*

Norwegian students are evaluated at the end of compulsory education, usually the year they turn 16. The Grade Point Average (GPA) is calculated as the average of all final-year teacher evaluated grades and externally graded exams. The GPA is used for ranking students applying for admission to upper secondary education. Students therefore have an incentive to perform well. We standardized the GPA score (mean=0, SD=1) within each birth year cohort to adjust for grade inflation. Even the lowest grades go into the GPA score, also those that would not be considered passing at a higher level of education. This means that nearly all students have a valid GPA. GPA was available for individuals born in 1985 or later. In total 77.4% of mothers (n=72,727) and 64.3% of fathers (n=60,412) had valid GPA scores. GPA was used as a continuous variable.

### *Mental and somatic health*

All persons who legally reside in Norway are members of the National Insurance Scheme and assigned a general practitioner. General practitioners and other health service providers, such as emergency rooms, send billing information to a governmental organization along with a diagnosis or reason for the visit in order to receive reimbursements. Due to economic incentives, it is unlikely that health visits go unreported. Diagnostic information is coded according to the International Classification of Primary Care (ICPC-2)<sup>40</sup>. The ICPC-2 contains both diagnoses and complaints. Linkage between data sources is possible via the unique national identity number.

We analysed 20 health conditions, of which 10 were mental health conditions. These covered a broad spectre of mental health conditions, corresponded to well-known conditions, and were sufficiently common to be analysed in both sexes. These analysed conditions were Depressive disorder, Anxiety disorders, Phobia/compulsive disorder, Acute stress reaction, Sleep disturbance, Alcohol use disorders, Substance use disorders, Hyperkinetic disorder (ADHD), Psychotic disorders, and Personality disorder. Likewise, we analysed 10 somatic health conditions. They were selected for their diversity in covering different health issues and for being sufficiently prevalent in both sexes in our sample of young adults. The included conditions were Headaches, Neck/back symptom/complaint, Abdominal pain/cramps general, Fractures, Acne, Injury musculoskeletal, Asthma, Allergic rhinitis, Laceration/cut, Naevus/mole. If at least one entry with the code was present between 10 and 5 years before the birth of the first child, the person was defined as having the condition. The ICD-10 codes included in each condition are listed in Table 1.

### Statistical analyses

We first described the prevalence of the health conditions by relationship type (partners, siblings, siblings-in-law). We then calculated correlations between partners (aim 1) while adjusting for birth year. We used OpenMx to estimate the correlations using Full Information Maximum Likelihood (FIML), thereby using all available data, whether complete or incomplete. Adjustments were made by adding the definition variables with slopes to means of the models. For the binary variables (all except GPA and EA), we used a liability threshold model. Hence, we used tetrachoric correlations for associations involving binary health outcomes, polyserial correlations for the associations involving GPA or EA and binary health outcomes, and Pearson correlations for associations involving only GPA and/or EA. We then estimated associations between different phenotypes in the two partners (aim 2) in a corresponding manner.

We then calculated correlations between siblings and siblings-in-law and compare these to the partner correlations to test whether the results were consistent with direct assortment on the observed traits (aim 3). Under direct assortment, the correlation for siblings-in-law ( $r_{in-law}$ ) equals the product of the correlations for partners ( $r_{partner}$ ) and siblings ( $r_{sibling}$ ). We have elaborated on the reasoning and provided simulations supporting this previously<sup>19</sup>. We use the observed correlations among partners, siblings, and in-laws to compute an *in-law inflation factor*, which equals  $r_{in-law}/(r_{partner} * r_{sibling})$ . We elaborate in Supplemental Figure S12 how various mechanisms of partner similarity influence correlations between siblings-in-law. Under direct assortment on the observed trait, the in-law inflation factor equals 1.00. With indirect assortment, all correlations are deflated to the same degree, and the in-law inflation factor is  $>1.00$ . Social homogamy increases all correlations and leads to an in-law inflation factor  $>1.00$  in realistic scenarios. Convergence increases correlation only among partners, leading to in-law inflation factors  $<1.00$ . We tested whether a model assuming direct assortment as the sole source of partner similarity had worse fit to the data than a model with correlations estimated independently for each relationship type, with no assumptions on the source of similarity. We conducted a likelihood-ratio test with 1 degree of freedom. Among couples where both partners had a sibling, the sibling-in-law relations at each side of the family were modelled with the same correlation, whereas the co-sibling-in-law correlations were estimated freely. All models were adjusted for mean sex differences.

The tetrachoric correlations rely on an underlying normal distribution. If the underlying distribution is left-skewed, the tetrachoric correlations can become overestimated. The product of correlations is pivotal for testing deviations from direct assortment. We therefore conducted simulations to determine whether left-skewness affected the product of the correlations (Supplemental Scripts S1 and S2). This was not the case. Hence, if the Pearson correlations  $r_{ab} * r_{bc} = r_{ac}$  for continuously non-normally distributed variables, then  $r_{ab}' * r_{bc}' = r_{ac}'$  holds true for their dichotomized tetrachoric counterparts, even if the individual tetrachoric correlations are overestimated.

To obtain results adjusted for educational attainment (aim 4), we additionally adjusted the above models for either GPA or EA. All analyses were run with the health conditions measured prospectively 10 to 5 years before parenthood and again cross-sectionally with health observed in 2015-2019. Using the prospective data, we also estimated the associations between partners, siblings, and siblings-in-law as odds ratios using multiple logistic regression, adjusting for each individual's phenotype. The adjusted association with the siblings-in-law's phenotype tests direct assortment, reasoning that if assortment is based on the phenotype, then the siblings-in-law's phenotype should not relate to the index person's trait once we account for the partner's phenotype.

#### **ACKNOWLEDGEMENTS**

This work is part of the REMENTA and PARMENT projects and was supported by the Research Council of Norway (#300668 and #334093, respectively). This work was performed on the TSD (Tjeneste for Sensitive Data) facilities, owned by the University of Oslo, operated and developed by the TSD service group at the University of Oslo, IT-Department (USIT). This work was partly supported by the Research Council of Norway through its Centres of Excellence funding scheme, project number 262700. This work was supported by the National Institute of Mental Health R01 Grants MH130448 and MH100141 (M.C.K.).

#### **DATA AVAILABILITY STATEMENT**

The data for this study encompass educational outcomes and primary care records for entire cohorts of the Norwegian population. Researchers can access the data by application to the Regional Committees for Medical and Health Research Ethics and the data owners (Statistics Norway and the Norwegian Directorate of Health). The authors cannot share these data with other researchers due to the sensitive nature and potential for identification. However, other researchers can contact the authors if they have questions concerning the data or overlapping research projects.

## REFERENCES

1. Horwitz, T. B., Balbona, J. V., Paulich, K. N. & Keller, M. C. Evidence of correlations between human partners based on systematic reviews and meta-analyses of 22 traits and UK Biobank analysis of 133 traits. *Nat. Hum. Behav.* **7**, 1568–1583 (2023).
2. Nordsletten, A. E. *et al.* Patterns of Nonrandom Mating Within and Across 11 Major Psychiatric Disorders. *JAMA Psychiatry* **73**, 354–361 (2016).
3. Conroy-Beam, D. *et al.* Assortative mating and the evolution of desirability covariation. *Evol. Hum. Behav.* **40**, 479–491 (2019).
4. Border, R. *et al.* Cross-trait assortative mating is widespread and inflates genetic correlation estimates. *Science* **378**, 754–761 (2022).
5. Nordmo, M. *et al.* The educational burden of disease: a cohort study. *Lancet Public Health* **7**, e549–e556 (2022).
6. Kinge, J. M. *et al.* Association of Household Income With Life Expectancy and Cause-Specific Mortality in Norway, 2005-2015. *JAMA* **321**, 1916 (2019).
7. Fry, A. *et al.* Comparison of Sociodemographic and Health-Related Characteristics of UK Biobank Participants With Those of the General Population. *Am. J. Epidemiol.* **186**, 1026–1034 (2017).
8. Sunde, H. F. *et al.* Genetic similarity between relatives provides evidence on the presence and history of assortative mating. 2023.06.27.546663 Preprint at <https://doi.org/10.1101/2023.06.27.546663> (2023).
9. Ayorech, Z. *et al.* The structure of psychiatric comorbidity without selection and assortative mating. <https://osf.io/d8t3q> (2023) doi:10.31234/osf.io/d8t3q.
10. Jepsen, O. H. *et al.* Genetic assortative mating for schizophrenia and bipolar disorder. *Eur. Psychiatry* 1–24 (2022) doi:10.1192/j.eurpsy.2022.2304.
11. Yengo, L. Mate choice through a genomic lens. *Nat. Rev. Genet.* 1–1 (2023) doi:10.1038/s41576-023-00605-w.

12. Tybur, J. M. & Gangestad, S. W. Mate preferences and infectious disease: theoretical considerations and evidence in humans. *Philos. Trans. R. Soc. B Biol. Sci.* **366**, 3375–3388 (2011).
13. Fisher, R. A. XV.—The Correlation between Relatives on the Supposition of Mendelian Inheritance. *Trans. R. Soc. Edinb.* **52**, 399–433 (1918).
14. Chiappori, P.-A., Oreffice, S. & Quintana-Domeque, C. Fatter Attraction: Anthropometric and Socioeconomic Matching on the Marriage Market. *J. Polit. Econ.* **120**, 659–695 (2012).
15. Cloninger, C. R., Rice, J. & Reich, T. Multifactorial Inheritance with Cultural Transmission and Assortative Mating II. A General Model of Combined Polygenic and Cultural Inheritance. (1979).
16. Plomin, R., Krapohl, E. & O'Reilly, P. F. Assortative Mating—A Missing Piece in the Jigsaw of Psychiatric Genetics. *JAMA Psychiatry* **73**, 323 (2016).
17. Maes, H. H. *et al.* Assortative mating for major psychiatric diagnoses in two population-based samples. *Psychol. Med.* **28**, 1389–1401 (1998).
18. Chiappori, P.-A., Dias, M. C. & Meghir, C. The Marriage Market, Labor Supply, and Education Choice. *J. Polit. Econ.* **126**, S26–S72 (2018).
19. Torvik, F. A. *et al.* Modeling assortative mating and genetic similarities between partners, siblings, and in-laws. *Nat. Commun.* **13**, 1108 (2022).
20. Robinson, M. R. *et al.* Genetic evidence of assortative mating in humans. *Nat. Hum. Behav.* **1**, 0016 (2017).
21. Keller, M. C., Medland, S. E. & Duncan, L. E. Are Extended Twin Family Designs Worth the Trouble? A Comparison of the Bias, Precision, and Accuracy of Parameters Estimated in Four Twin Family Models. *Behav. Genet.* **40**, 377–393 (2010).
22. Gonggrijp, B. M. A. *et al.* The mechanism of assortative mating for educational attainment: a study of Finnish and Dutch twins and their spouses. *Front. Genet.* **14**, (2023).
23. Reynolds, C. A., Baker, L. A. & Pedersen, N. L. Multivariate Models of Mixed Assortment: Phenotypic Assortment and Social Homogamy for Education and Fluid Ability. *Behav. Genet.* **30**, 455–476 (2000).

24. Collado, M. D., Ortuño-Ortín, I. & Stuhler, J. Estimating Intergenerational and Assortative Processes in Extended Family Data. *Rev. Econ. Stud.* **90**, 1195–1227 (2023).
25. Ask, H., Rognum, K., Torvik, F. A., Røysamb, E. & Tambs, K. Non-Random Mating and Convergence Over Time for Alcohol Consumption, Smoking, and Exercise: The Nord-Trøndelag Health Study. *Behav. Genet.* **42**, 354–365 (2012).
26. Sjaarda, J. & Kutalik, Z. Partner choice, confounding and trait convergence all contribute to phenotypic partner similarity. *Nat. Hum. Behav.* 1–14 (2023) doi:10.1038/s41562-022-01500-w.
27. Luo, S. Assortative mating and couple similarity: Patterns, mechanisms, and consequences. *Soc. Personal. Psychol. Compass* **11**, e12337 (2017).
28. Xia, C., Canela-Xandri, O., Rawlik, K. & Tenesa, A. Evidence of horizontal indirect genetic effects in humans. *Nat. Hum. Behav.* **5**, 399–406 (2021).
29. Baker, L. A., Treloar, S. A., Reynolds, C. A., Heath, A. C. & Martin, N. G. Genetics of educational attainment in Australian twins: Sex differences and secular changes. *Behav. Genet.* **26**, 89–102 (1996).
30. Ask, H., Idstad, M., Engdahl, B. & Tambs, K. Non-random Mating and Convergence Over Time for Mental Health, Life Satisfaction, and Personality: The Nord-Trøndelag Health Study. *Behav. Genet.* **43**, 108–119 (2013).
31. Power, R. A. *et al.* Fecundity of Patients With Schizophrenia, Autism, Bipolar Disorder, Depression, Anorexia Nervosa, or Substance Abuse vs Their Unaffected Siblings. *JAMA Psychiatry* **70**, 22–30 (2013).
32. Lahey, B. B. *et al.* Is there a general factor of prevalent psychopathology during adulthood? *J. Abnorm. Psychol.* **121**, 971–977 (2012).
33. Nordmo, M. *et al.* The association between parental internalizing disorders and child school performance. *Npj Sci. Learn.* **8**, 1–6 (2023).
34. Kinge, J. M. *et al.* Parental income and mental disorders in children and adolescents: prospective register-based study. *Int. J. Epidemiol.* **50**, 1615–1627 (2021).

35. Bulmer, M. G. *The Mathematical Theory of Quantitative Genetics*. (Oxford University Press).
36. Balbona, J. V., Kim, Y. & Keller, M. C. Estimation of Parental Effects Using Polygenic Scores. *Behav. Genet.* **51**, 264–278 (2021).
37. Okbay, A. *et al.* Polygenic prediction of educational attainment within and between families from genome-wide association analyses in 3 million individuals. *Nat. Genet.* **54**, 437–449 (2022).
38. Torvik, F. A. *et al.* Diagnostic and genetic overlap of three common mental disorders in structured interviews and health registries. *Acta Psychiatr. Scand.* **137**, 54–64 (2018).
39. Magnus, P. *et al.* Cohort Profile Update: The Norwegian Mother and Child Cohort Study (MoBa). *Int. J. Epidemiol.* **45**, 382–388 (2016).
40. *ICPC-2-R: international classification of primary care*. (Oxford University Press, 2005).



## TABLES AND FIGURES

**Table 1.** List of ICPC-2 codes for the mental and somatic health condition, prevalence in the sample (including education), and prevalence among partners and relatives of affected individuals, 10 to 5 years before the birth of the first child.

| Variable                          | ICPC-2 codes | Index  |       | Partner of affected |       | Sibling of affected |       | In-law of affected |       |
|-----------------------------------|--------------|--------|-------|---------------------|-------|---------------------|-------|--------------------|-------|
|                                   |              | n      | %     | n                   | %     | n                   | %     | n                  | %     |
| University education              |              | 93,303 | 49.84 | 64,110              | 68.89 | 48,682              | 61.23 | 46,001             | 58.16 |
| Grade Point Average among top 20% |              | 26,824 | 20.15 | 8,058               | 37.43 | 7,654               | 42.38 | 5,085              | 32.38 |
| Depressive disorder               | P76          | 17,086 | 9.09  | 2,378               | 13.92 | 2,098               | 15.92 | 1,457              | 10.63 |
| Anxiety disorder/anxiety state    | P74          | 6,584  | 3.50  | 372                 | 5.65  | 399                 | 7.84  | 218                | 4.15  |
| Phobia/compulsive disorder        | P79          | 2,697  | 1.44  | 66                  | 2.45  | 69                  | 3.20  | 39                 | 1.78  |
| Acute stress reaction             | P02          | 14,288 | 7.60  | 1,512               | 10.58 | 1,617               | 14.59 | 978                | 8.46  |
| Sleep disturbance                 | P06          | 10,109 | 5.38  | 834                 | 8.25  | 698                 | 8.87  | 484                | 5.95  |
| Alcohol use disorders             | P15, P16     | 3,344  | 1.78  | 110                 | 3.29  | 82                  | 3.18  | 53                 | 1.99  |
| Substance use disorders           | P18, P19     | 3,006  | 1.60  | 524                 | 17.43 | 184                 | 8.75  | 127                | 5.76  |

| Variable                      | ICPC-2 codes            | Index  |       | Partner of affected |       | Sibling of affected |       | In-law of affected |       |
|-------------------------------|-------------------------|--------|-------|---------------------|-------|---------------------|-------|--------------------|-------|
|                               |                         | n      | %     | n                   | %     | n                   | %     | n                  | %     |
| Hyperkinetic disorder         | P81                     | 4,840  | 2.58  | 412                 | 8.51  | 518                 | 14.67 | 157                | 4.25  |
| Psychotic disorders           | P72, P98, P73           | 1,420  | 0.76  | 44                  | 3.10  | 47                  | 4.22  | 18                 | 1.58  |
| Personality disorder          | P80                     | 877    | 0.47  | 20                  | 2.28  | 13                  | 2.03  | <10                |       |
| Headaches                     | N89, N90, N01, N95      | 25,716 | 13.68 | 3,226               | 12.54 | 3,366               | 16.26 | 2,842              | 13.40 |
| Neck/back symptom/complaint   | L01, L02, L03           | 35,247 | 18.76 | 7,620               | 21.62 | 6,155               | 21.98 | 5,382              | 18.71 |
| Abdominal pain/cramps general | D01                     | 30,338 | 16.14 | 4,354               | 14.35 | 4,348               | 17.96 | 3,780              | 15.16 |
| Fractures                     | L72, L73, L74, L75, L76 | 13,489 | 7.18  | 1,188               | 8.81  | 1,007               | 9.10  | 823                | 7.46  |
| Acne                          | S96                     | 11,145 | 5.93  | 790                 | 7.09  | 1,108               | 11.80 | 563                | 6.04  |
| Injury musculoskeletal        | L81                     | 16,043 | 8.54  | 1,742               | 10.86 | 1,546               | 11.80 | 1,219              | 9.22  |
| Asthma                        | R96                     | 12,593 | 6.70  | 916                 | 7.27  | 1,422               | 13.87 | 742                | 7.11  |
| Allergic rhinitis             | R97                     | 18,943 | 10.08 | 2,030               | 10.72 | 2,455               | 15.53 | 1,542              | 9.72  |
| Laceration/cut                | S18                     | 19,170 | 10.20 | 1,916               | 9.99  | 1,886               | 11.81 | 1,611              | 10.16 |
| Naevus/mole                   | S82                     | 20,382 | 10.85 | 2,366               | 11.61 | 2,591               | 15.02 | 1,853              | 10.79 |

**Table 2.** Median correlations within and across traits in different categories.

| Trait in female | Trait in male | Within or across traits | Prospective, adjusted for age | Prospective, adjusted for age GPA | Prospective, adjusted for age and educational attainment | Cross-sectional, adjusted for age |
|-----------------|---------------|-------------------------|-------------------------------|-----------------------------------|----------------------------------------------------------|-----------------------------------|
| GPA             | GPA           | Within                  | 0.43                          | –                                 | 0.15                                                     | 0.43                              |
| GPA             | EA            | Across                  | 0.43                          | –                                 | –                                                        | 0.43                              |
| EA              | GPA           | Across                  | 0.44                          | –                                 | –                                                        | 0.44                              |
| EA              | EA            | Within                  | 0.47                          | 0.29                              | –                                                        | 0.47                              |
| GPA             | Mental        | Across                  | -0.16                         | –                                 | -0.05                                                    | -0.19                             |
| EA              | Mental        | Across                  | -0.17                         | -0.09                             | –                                                        | -0.19                             |
| Mental          | GPA           | Across                  | -0.16                         | –                                 | -0.03                                                    | -0.16                             |
| Mental          | EA            | Across                  | -0.16                         | -0.08                             | –                                                        | -0.17                             |
| GPA             | Somatic       | Across                  | -0.08                         | –                                 | -0.01                                                    | -0.10                             |
| EA              | Somatic       | Across                  | -0.09                         | -0.04                             | –                                                        | -0.10                             |
| Somatic         | GPA           | Across                  | -0.06                         | –                                 | -0.01                                                    | -0.09                             |
| Somatic         | EA            | Across                  | -0.08                         | -0.04                             | –                                                        | -0.10                             |
| Mental          | Mental        | Within                  | 0.14                          | 0.11                              | 0.10                                                     | 0.25                              |
| Mental          | Mental        | Across                  | 0.13                          | 0.08                              | 0.07                                                     | 0.16                              |
| Mental          | Somatic       | Across                  | 0.03                          | 0.02                              | 0.01                                                     | 0.05                              |
| Somatic         | Mental        | Across                  | 0.03                          | 0.02                              | 0.01                                                     | 0.05                              |
| Somatic         | Somatic       | Within                  | 0.04                          | 0.04                              | 0.03                                                     | 0.06                              |
| Somatic         | Somatic       | Across                  | 0.01                          | 0.01                              | 0.01                                                     | 0.02                              |

Note: GPA=Grade point average; EA=educational attainment.

**Table 3.** Correlations between relatives in educational outcomes and 10 mental and 10 somatic health conditions 10 to 5 years before a couple had their first child, including 95% confidence intervals, along with tests of deviations from direct assortment. Adjusted for sex and year of birth.

| Variable               | r(partner)        | r(sibling)        | r(inlaw)           | Inlaw<br>inf. | Deviation<br>from direct<br>assortment,<br>p-value |
|------------------------|-------------------|-------------------|--------------------|---------------|----------------------------------------------------|
| Grade point average    | 0.42 [0.42, 0.43] | 0.52 [0.52, 0.53] | 0.29 [0.29, 0.30]  | 1.33          | <1.00e-99                                          |
| Educational attainment | 0.48 [0.47, 0.48] | 0.40 [0.40, 0.40] | 0.29 [0.28, 0.29]  | 1.50          | <1.00e-99                                          |
| Depressive disorder    | 0.16 [0.15, 0.18] | 0.23 [0.21, 0.24] | 0.07 [0.06, 0.09]  | 1.91          | 3.39e-05                                           |
| Anxiety disorder       | 0.11 [0.07, 0.14] | 0.20 [0.17, 0.22] | 0.04 [0.01, 0.07]  | 1.85          | 0.221                                              |
| Phobias                | 0.09 [0.03, 0.15] | 0.13 [0.09, 0.17] | 0.03 [-0.02, 0.08] | 2.64          | 0.475                                              |
| PTSD                   | 0.11 [0.09, 0.13] | 0.25 [0.24, 0.27] | 0.05 [0.04, 0.07]  | 1.93          | 0.006                                              |
| Sleep problems         | 0.11 [0.08, 0.13] | 0.15 [0.13, 0.17] | 0.04 [0.02, 0.06]  | 2.34          | 0.053                                              |
| Alcohol use disorder   | 0.10 [0.06, 0.15] | 0.14 [0.10, 0.18] | 0.05 [0.00, 0.10]  | 3.43          | 0.138                                              |
| Substance use disorder | 0.54 [0.51, 0.57] | 0.37 [0.34, 0.40] | 0.27 [0.23, 0.30]  | 1.32          | 0.001                                              |
| ADHD                   | 0.24 [0.20, 0.27] | 0.43 [0.40, 0.45] | 0.10 [0.07, 0.13]  | 0.97          | 0.884                                              |
| Psychotic disorders    | 0.21 [0.13, 0.28] | 0.21 [0.16, 0.26] | 0.04 [-0.04, 0.11] | 0.84          | 0.848                                              |
| Personality disorder   | 0.21 [0.11, 0.32] | 0.18 [0.09, 0.26] | 0.10 [0.00, 0.20]  | 2.70          | 0.226                                              |
| Headaches              | 0.04 [0.02, 0.06] | 0.11 [0.10, 0.13] | 0.03 [0.01, 0.04]  | 5.90          | 0.001                                              |
| Neck/back              | 0.08 [0.07, 0.09] | 0.13 [0.12, 0.14] | 0.05 [0.04, 0.06]  | 4.34          | 1.52e-10                                           |
| Abdominal pain         | 0.03 [0.02, 0.05] | 0.10 [0.09, 0.12] | 0.02 [0.01, 0.04]  | 6.92          | 0.001                                              |
| Fractures              | 0.07 [0.05, 0.09] | 0.09 [0.07, 0.11] | 0.03 [0.01, 0.05]  | 4.61          | 0.014                                              |

|                        |                   |                   |                    |      |          |
|------------------------|-------------------|-------------------|--------------------|------|----------|
| Acne                   | 0.04 [0.02, 0.07] | 0.21 [0.20, 0.23] | 0.02 [0.00, 0.04]  | 2.66 | 0.168    |
| Injury musculoskeletal | 0.08 [0.06, 0.09] | 0.13 [0.12, 0.15] | 0.05 [0.03, 0.06]  | 4.61 | 2.40e-05 |
| Asthma                 | 0.02 [0.00, 0.04] | 0.23 [0.21, 0.24] | 0.02 [-0.00, 0.04] | 3.92 | 0.153    |
| Allergic rhinitis      | 0.02 [0.00, 0.04] | 0.19 [0.17, 0.20] | 0.01 [-0.00, 0.03] | 3.79 | 0.166    |
| Laceration/cut         | 0.04 [0.02, 0.06] | 0.07 [0.06, 0.09] | 0.02 [0.00, 0.03]  | 5.76 | 0.085    |
| Naevus/mole            | 0.06 [0.04, 0.07] | 0.14 [0.13, 0.16] | 0.01 [-0.01, 0.02] | 1.11 | 0.902    |

Note: The p-value arises from comparing a constrained model, where in-law correlation is the product of partner and sibling correlations, to an unconstrained model with independent estimates for each relationship type. A low p-value signifies a poor fit for direct assortment.

**FIGURES**

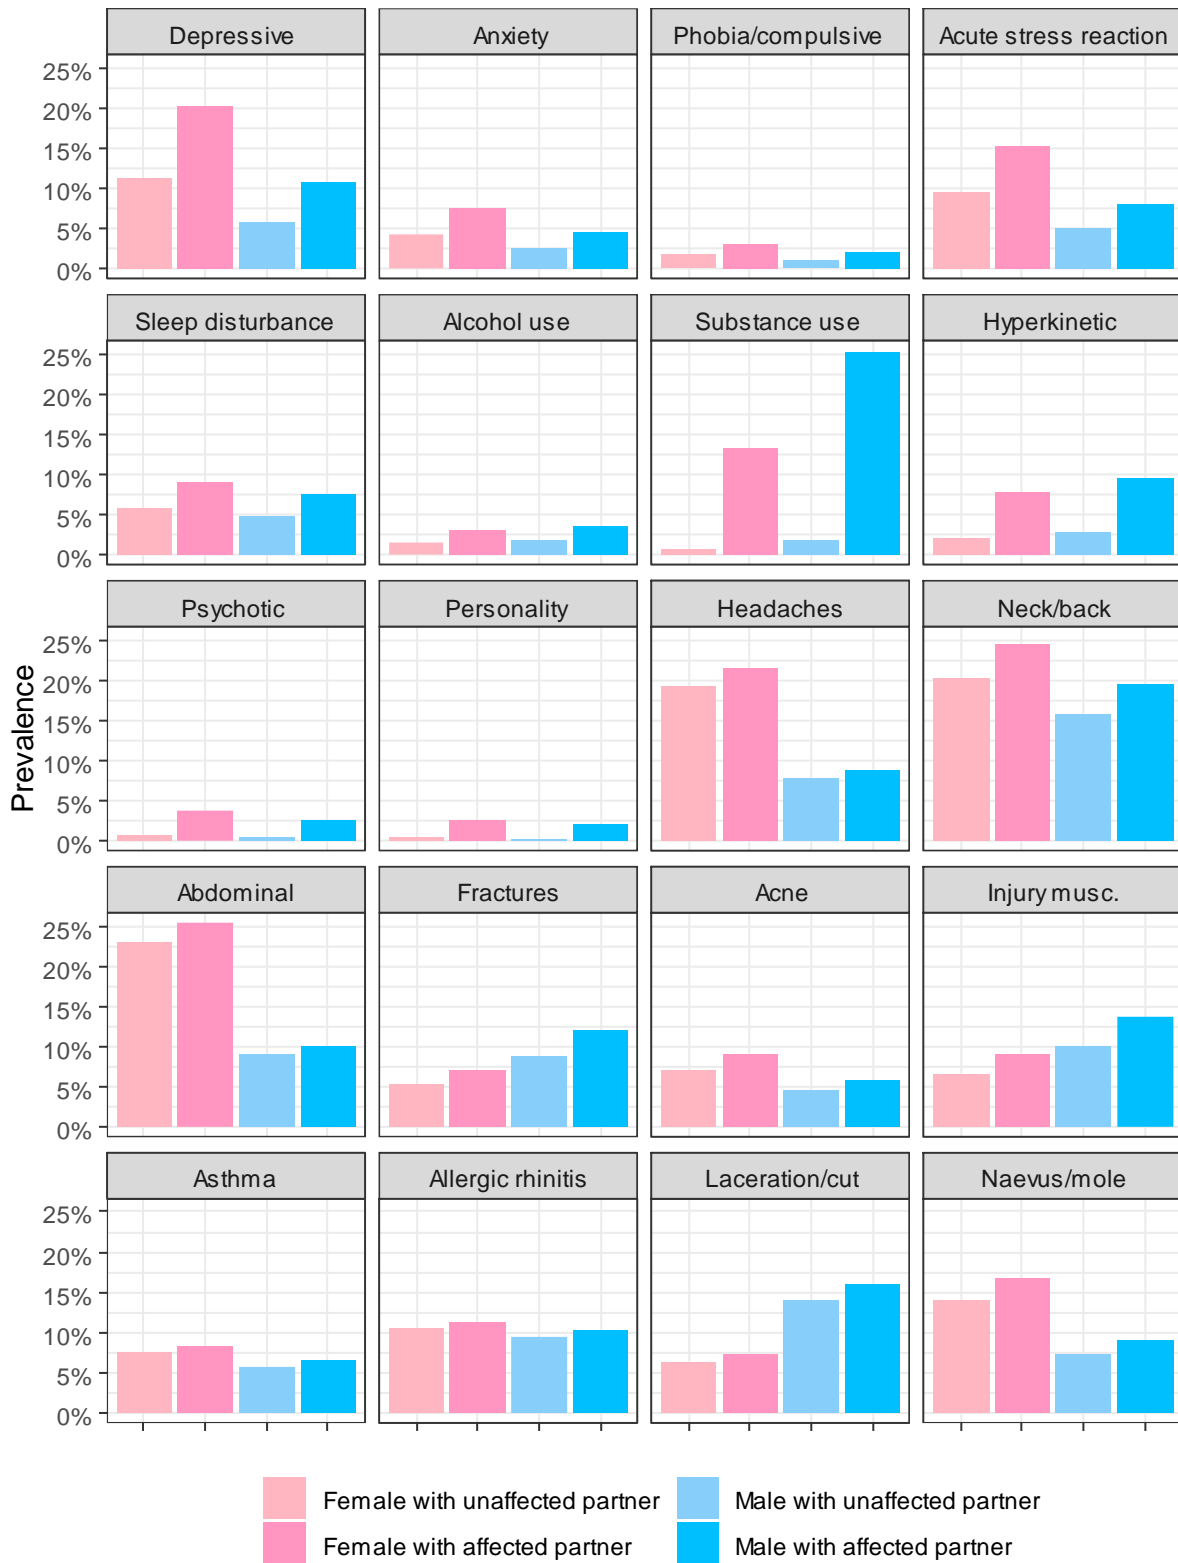

**Figure 1.** Prevalence of 10 mental and 10 somatic health conditions among males and females with unaffected and affected partners, 10 to 5 years before a couple had their first child.

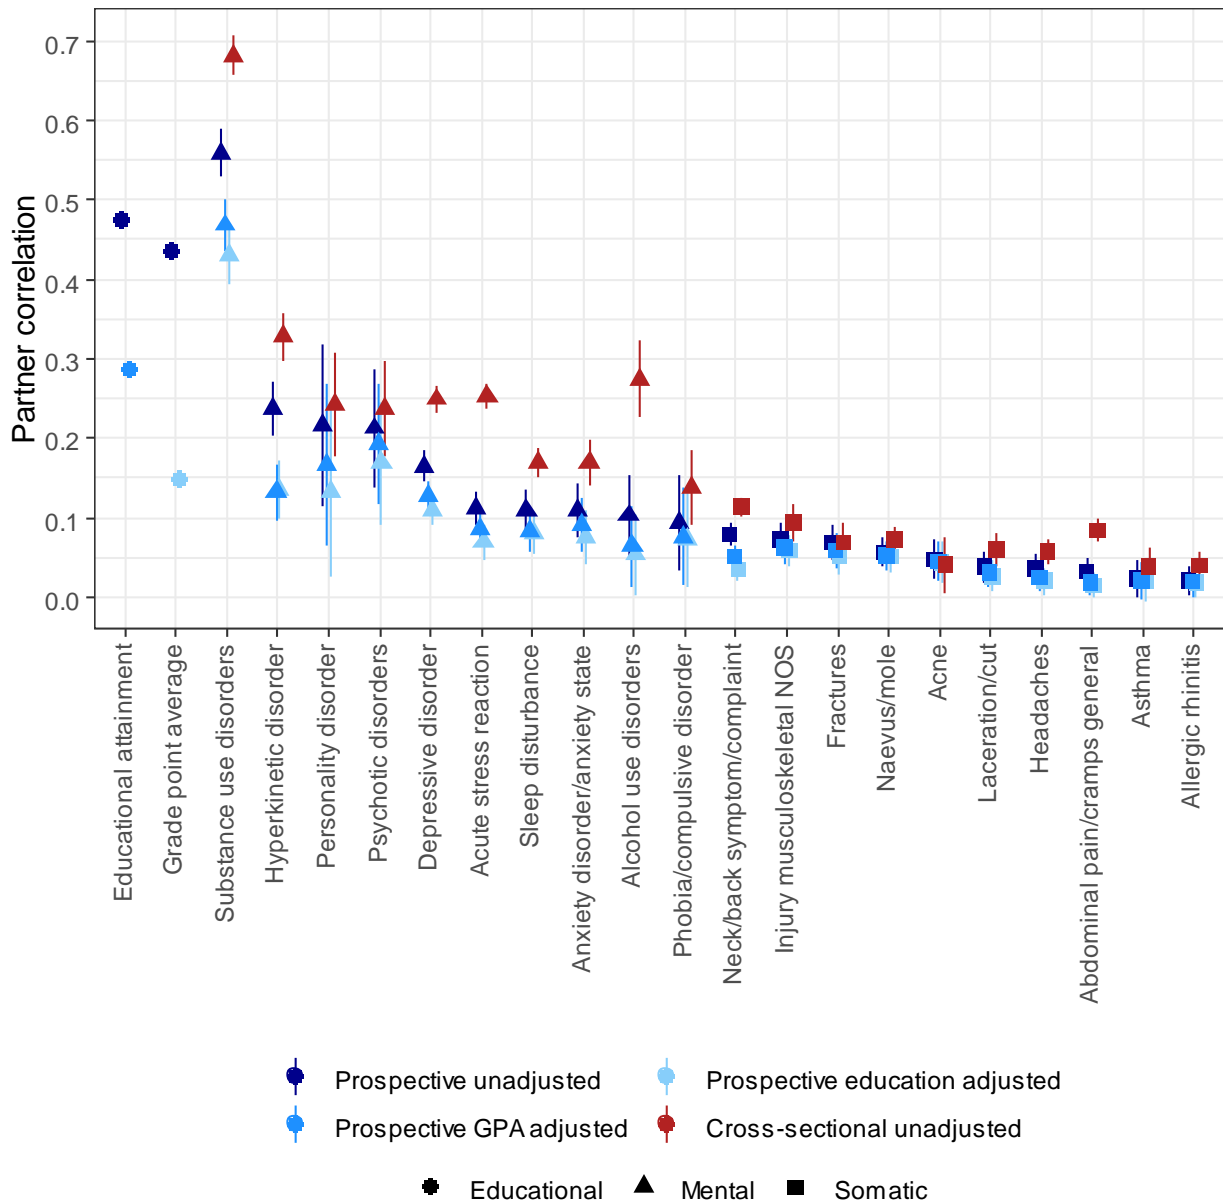

**Figure 2.** Correlations between female and male partners for educational outcomes and 10 mental health and 10 somatic health phenotypes 10 to 5 years before they had their first child and cross-sectionally in 2015-2019.

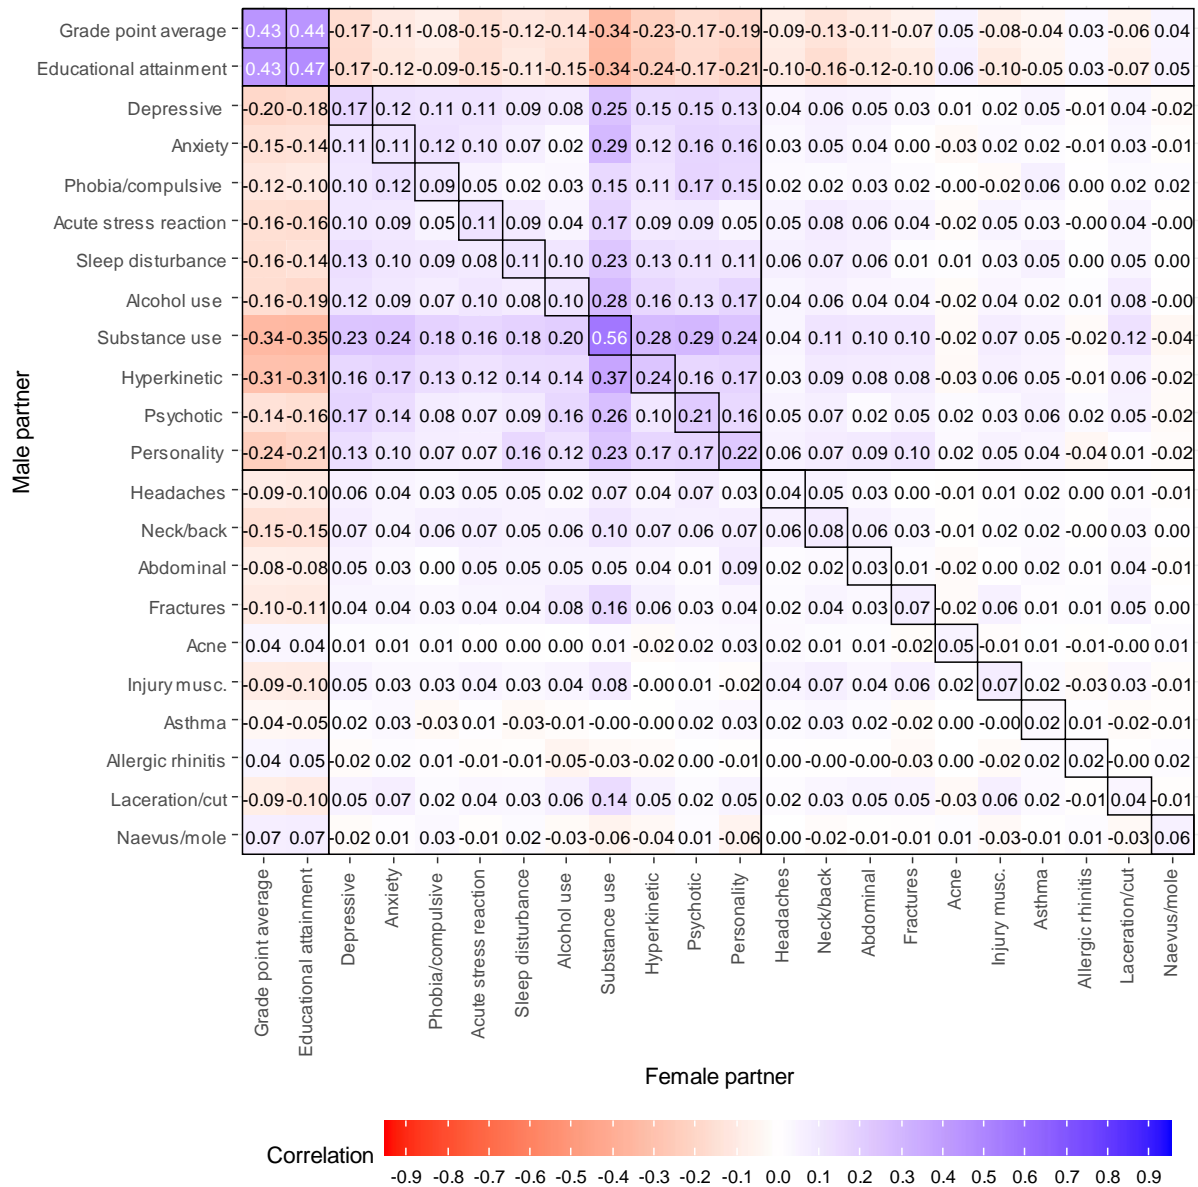

**Figure 3.** Within and across-trait partner correlations for educational outcomes, 10 mental health conditions, and 10 somatic health conditions, 10 to 5 years before first child, all adjusted for age.
