# Supplementary material for: Non-random Mating Patterns in Education, Mental, and Somatic Health: A Population Study on Within- and Cross-Trait Associations
Source: bioRxiv or medRxiv preprint supplement (doi:10.1101/2023.11.27.23299055), 2024-07-05
Supplement: Supplementary file [file media-1.pdf]

## SUPPLEMENTARY INFORMATION

### Non-random Mating Patterns in Education, Mental, and Somatic Health: A Population Study on Within- and Cross-Trait Associations

FA Torvik, HF Sunde, R Cheesman, NH Eftedal, MC Keller, E Ystrom, EM Eilertsen

Corresponding author: Fartein Ask Torvik, [fartein.ask.torvik@fhi.no](mailto:fartein.ask.torvik@fhi.no)

#### Table of contents

##### Supplemental information for prospective analyses

|                        |    |
|------------------------|----|
| Supplemental Figure S1 | S2 |
| Supplemental Figure S2 | S3 |
| Supplemental Figure S3 | S4 |

##### Supplemental information for prospective analyses with odds ratios

|                        |    |
|------------------------|----|
| Supplemental Figure S4 | S5 |
| Supplemental Figure S5 | S6 |
| Supplemental Table S1  | S7 |

##### Supplemental information for cross-sectional analyses

|                          |     |
|--------------------------|-----|
| Supplemental Table S2    | S8  |
| Supplemental Table S3    | S9  |
| Supplemental Figure S6   | S10 |
| Supplemental Figure S7   | S11 |
| Supplemental Figure S8   | S12 |
| Supplementary Figure S9  | S13 |
| Supplementary Figure S10 | S14 |
| Supplemental Figure S11  | S15 |

##### Supplemental information for methods

|                         |     |
|-------------------------|-----|
| Supplemental Figure S12 | S16 |
| Supplemental Script S1  | S17 |
| Supplemental Script S2  | S18 |

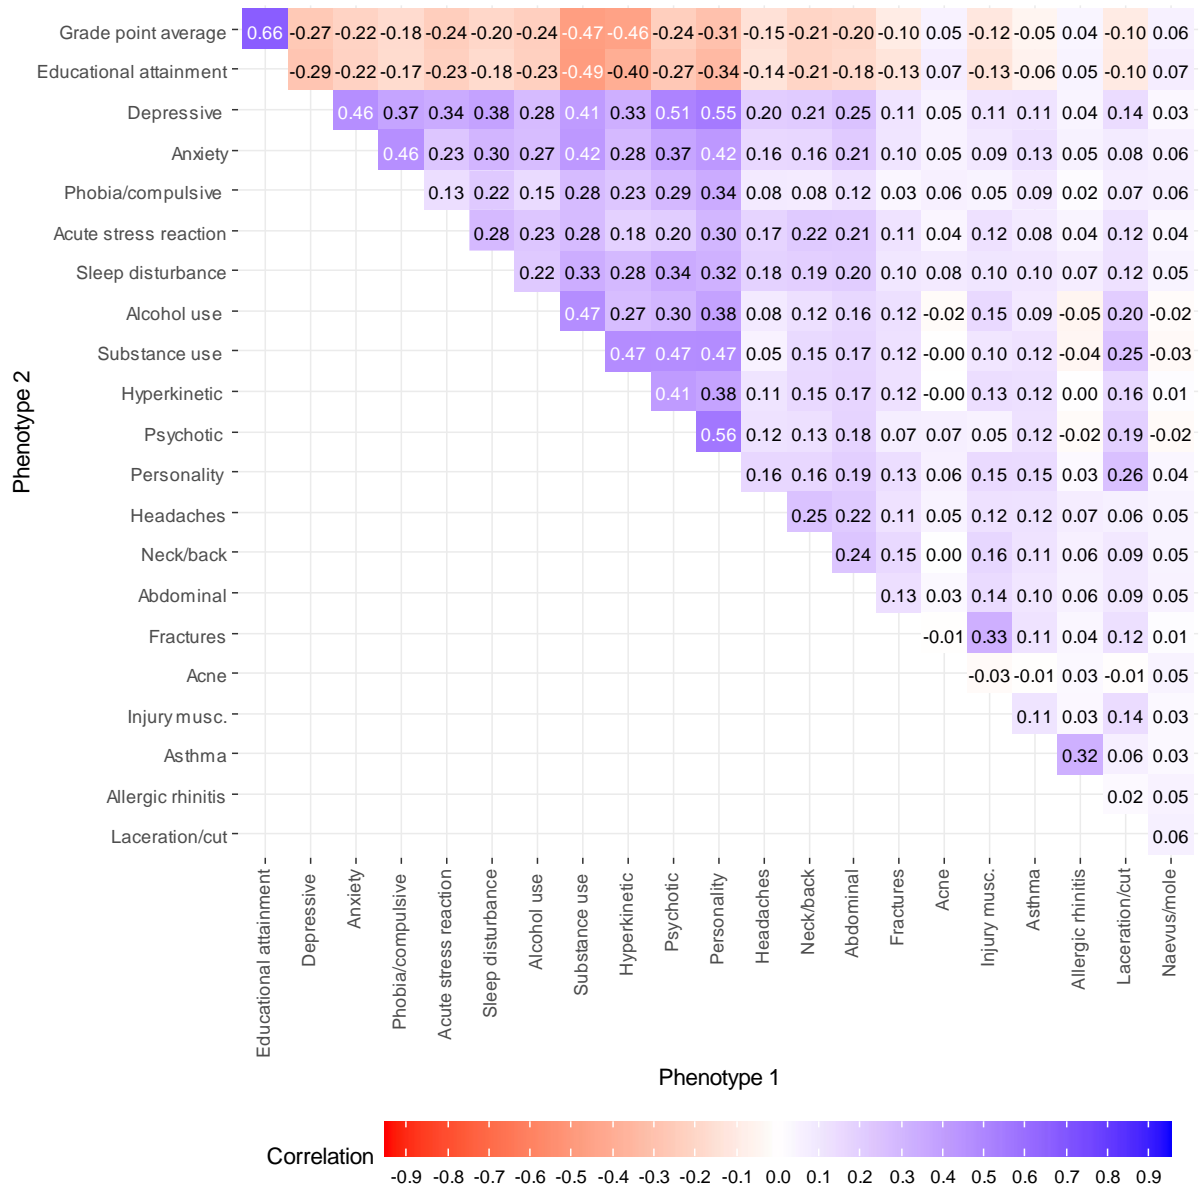

**Supplemental Figure S1.** Within person correlations for educational outcomes, 10 mental health conditions, and 10 somatic health conditions, 10 to 5 years before first child. Adjusted for age and sex.

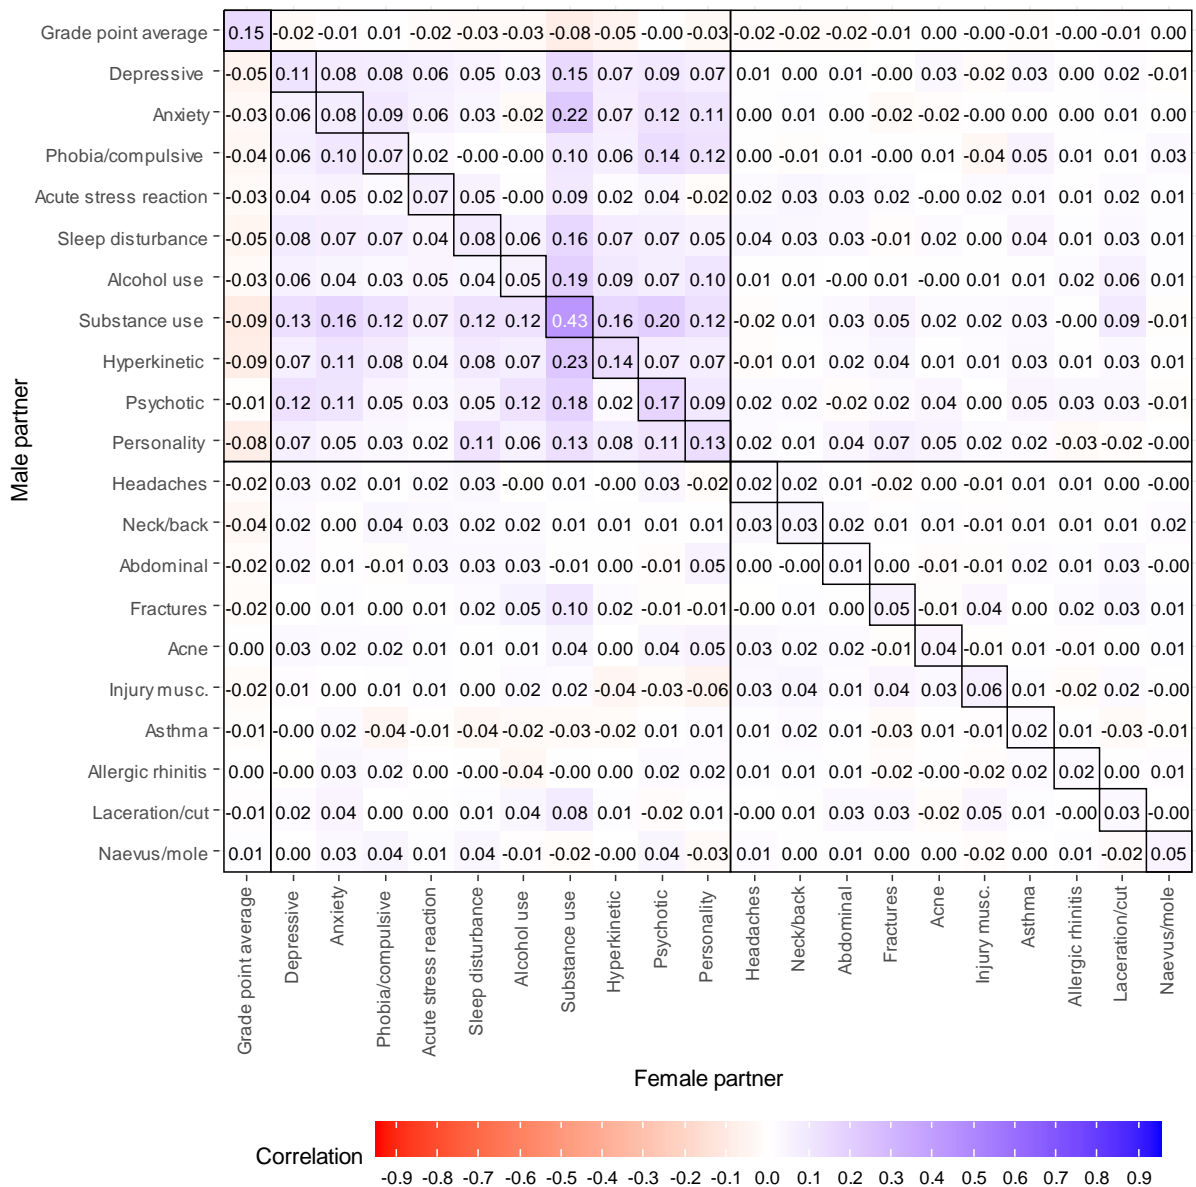

**Supplemental Figure S2.** Within and across-trait partner correlations for 10 mental health conditions, and 10 somatic health conditions, 10 to 5 years before first child. Adjusted for age and educational attainment.

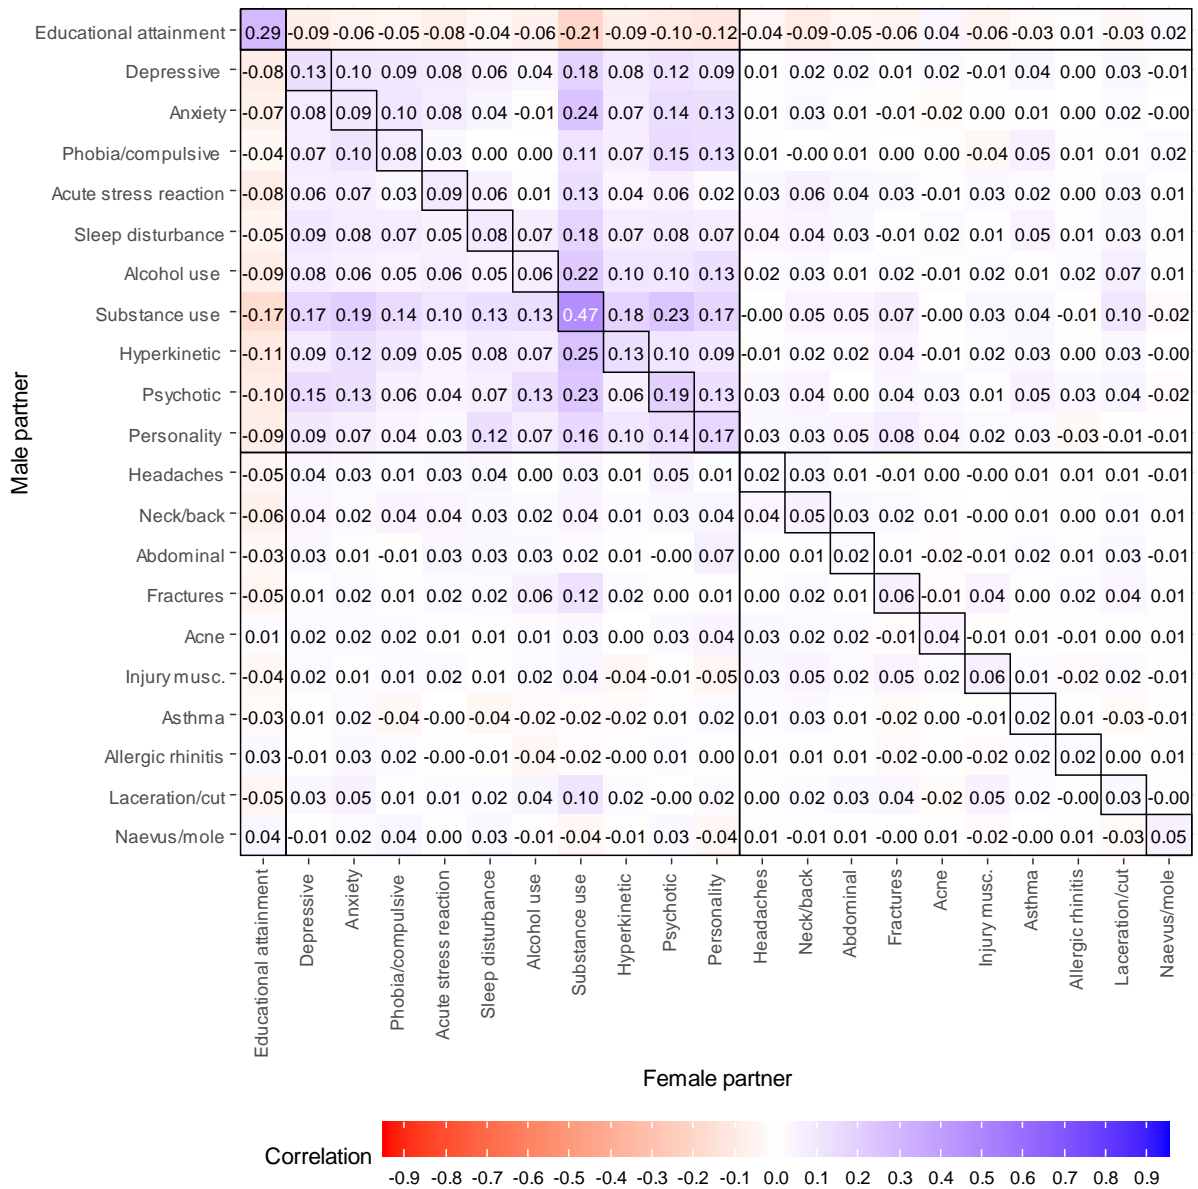

**Supplemental Figure S3.** Within and across-trait partner correlations for 10 mental health conditions, and 10 somatic health conditions, 10 to 5 years before first child. Adjusted for age and grade point average.

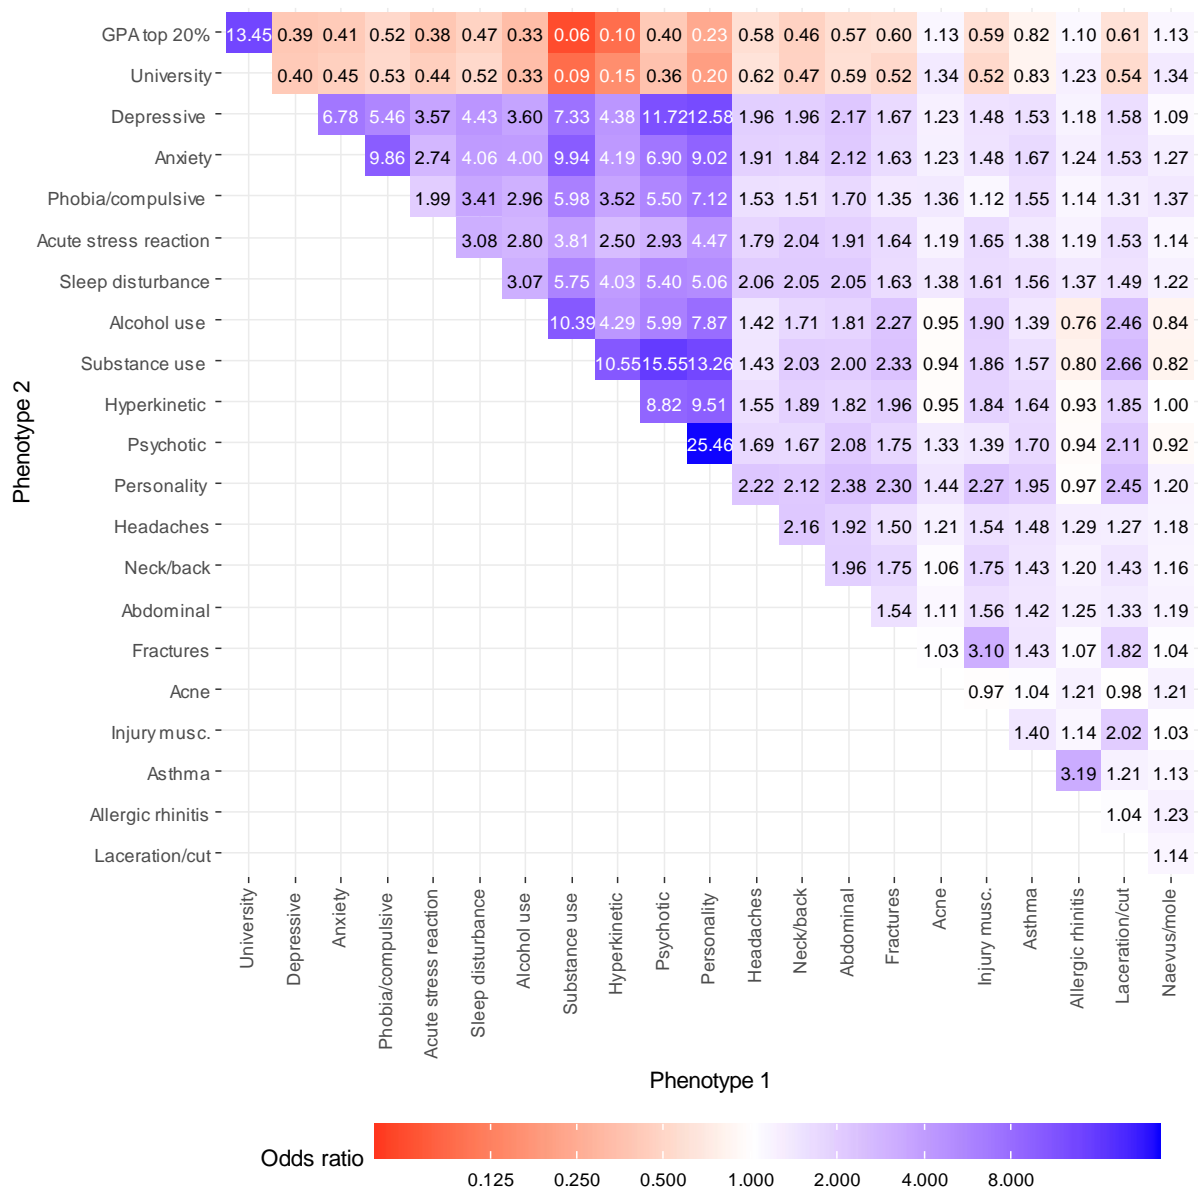

**Supplemental Figure S4.** Odds ratios for within person associations between educational outcomes, 10 mental health conditions, and 10 somatic health conditions, 10 to 5 years before first child. Adjusted for age and sex.

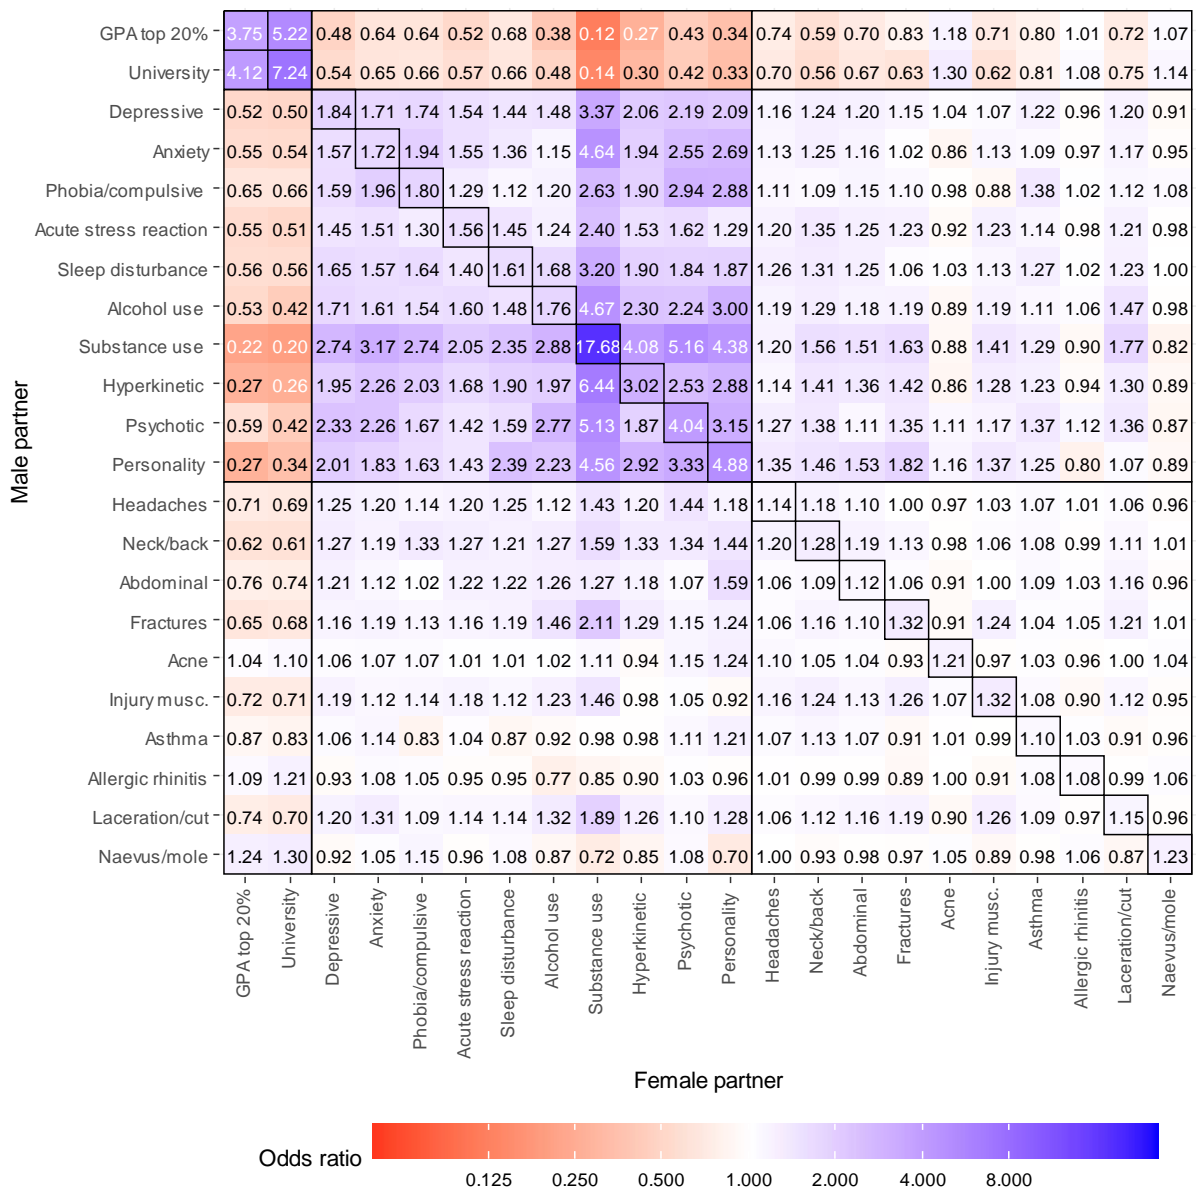

**Supplemental Figure S5.** Odds ratios for within and across-trait partner associations between educational outcomes, 10 mental health conditions, and 10 somatic health conditions, 10 to 5 years before first child, all adjusted for age.

**Supplemental Table S1.** Results from multiple binary logistic regressions of each of the educational outcomes and the 10 mental and 10 somatic health conditions on the corresponding traits in partners, siblings, and in-laws. Health conditions were measured 10 to 5 years before a couple had their first child. Results expressed as adjusted odds ratios (OR), including 95% confidence intervals. Significant adjusted associations with siblings-in-law indicate deviations from direct assortment.

|                        | OR(partner)          | OR(sibling)       | OR(in-law)        |
|------------------------|----------------------|-------------------|-------------------|
| GPA among top 20%      | 2.76 [2.55, 3.00]    | 4.57 [4.22, 4.94] | 1.54 [1.42, 1.68] |
| University education   | 5.35 [5.11, 5.59]    | 3.58 [3.44, 3.73] | 1.76 [1.69, 1.83] |
| Depressive disorder    | 1.77 [1.62, 1.94]    | 2.36 [2.17, 2.56] | 1.27 [1.15, 1.39] |
| Anxiety disorder       | 1.59 [1.29, 1.96]    | 2.68 [2.28, 3.16] | 1.18 [0.94, 1.47] |
| Phobias                | 1.73 [1.10, 2.71]    | 2.17 [1.49, 3.15] | 1.38 [0.85, 2.25] |
| PTSD                   | 1.46 [1.31, 1.63]    | 2.72 [2.48, 2.98] | 1.13 [1.01, 1.26] |
| Sleep problems         | 1.58 [1.38, 1.82]    | 1.89 [1.66, 2.15] | 1.05 [0.90, 1.24] |
| Alcohol use disorder   | 1.69 [1.16, 2.46]    | 2.04 [1.39, 2.98] | 1.41 [0.91, 2.19] |
| Substance use disorder | 16.07 [12.83, 20.12] | 4.91 [3.61, 6.68] | 3.74 [2.75, 5.08] |
| ADHD                   | 2.73 [2.17, 3.43]    | 6.40 [5.37, 7.62] | 1.37 [1.03, 1.81] |
| Psychotic disorders    | 2.91 [1.53, 5.51]    | 3.41 [2.08, 5.59] | 0.96 [0.39, 2.32] |
| Personality disorder   | 1.99 [0.49, 8.06]    | 3.23 [1.19, 8.74] | 3.39 [1.25, 9.18] |
| Headaches              | 1.11 [1.03, 1.19]    | 1.49 [1.39, 1.59] | 1.05 [0.98, 1.12] |
| Neck/back              | 1.25 [1.19, 1.31]    | 1.49 [1.42, 1.57] | 1.14 [1.08, 1.20] |
| Abdominal pain         | 1.11 [1.04, 1.18]    | 1.41 [1.33, 1.50] | 1.06 [1.00, 1.13] |
| Fractures              | 1.27 [1.14, 1.42]    | 1.42 [1.27, 1.58] | 1.19 [1.06, 1.33] |
| Acne                   | 1.14 [1.00, 1.30]    | 2.33 [2.10, 2.59] | 0.96 [0.83, 1.11] |
| Injury musculoskeletal | 1.29 [1.17, 1.41]    | 1.63 [1.49, 1.79] | 1.13 [1.03, 1.25] |
| Asthma                 | 1.12 [0.99, 1.27]    | 2.50 [2.28, 2.75] | 1.04 [0.92, 1.18] |
| Allergic rhinitis      | 1.09 [1.00, 1.18]    | 2.03 [1.89, 2.18] | 1.02 [0.94, 1.12] |
| Laceration/cut         | 1.18 [1.08, 1.28]    | 1.21 [1.11, 1.32] | 1.04 [0.96, 1.14] |
| Naevus/mole            | 1.18 [1.09, 1.27]    | 1.61 [1.50, 1.73] | 1.06 [0.98, 1.14] |

**Supplemental Table S2.** List of ICPC-2 codes for the mental and somatic health condition, prevalence in the sample (including education), and prevalence among partners and relatives of affected individuals, measured cross sectionally in 2015-2019.

| Variable                       | ICPC-2 codes            | Index  |       | Partner of affected |       | Sibling of affected |       | In-law of affected |       |
|--------------------------------|-------------------------|--------|-------|---------------------|-------|---------------------|-------|--------------------|-------|
|                                |                         | n      | %     | n                   | %     | n                   | %     | n                  | %     |
| GPA among top 20%              |                         | 26,824 | 20.15 | 8,058               | 37.43 | 7,654               | 42.38 | 5,085              | 32.38 |
| University education           |                         | 93,303 | 49.84 | 64,110              | 68.89 | 48,682              | 61.23 | 46,001             | 58.16 |
| Depressive disorder            | P76                     | 21,811 | 11.61 | 4,126               | 18.92 | 2,966               | 17.59 | 2,352              | 13.47 |
| Anxiety disorder/anxiety state | P74                     | 8,202  | 4.36  | 648                 | 7.90  | 560                 | 8.83  | 353                | 5.34  |
| Phobia/compulsive disorder     | P79                     | 3,702  | 1.97  | 146                 | 3.94  | 128                 | 4.44  | 93                 | 3.12  |
| Acute stress reaction          | P02                     | 24,996 | 13.30 | 5,442               | 21.77 | 3,320               | 16.81 | 2,564              | 12.67 |
| Sleep disturbance              | P06                     | 16,807 | 8.94  | 2,424               | 14.42 | 1,619               | 12.17 | 1,312              | 9.63  |
| Alcohol use disorders          | P15, P16                | 2,505  | 1.33  | 158                 | 6.31  | 91                  | 4.83  | 64                 | 3.29  |
| Substance use disorders        | P18, P19                | 2,899  | 1.54  | 724                 | 24.97 | 163                 | 8.22  | 143                | 6.76  |
| Hyperkinetic disorder          | P81                     | 5,216  | 2.78  | 618                 | 11.85 | 542                 | 14.03 | 223                | 5.60  |
| Psychotic disorders            | P72, P98, P73           | 1,965  | 1.05  | 80                  | 4.07  | 95                  | 6.26  | 29                 | 1.88  |
| Personality disorder           | P80                     | 1,652  | 0.88  | 64                  | 3.87  | 53                  | 4.39  | 25                 | 1.99  |
| Headaches                      | N89, N90, N01, N95      | 32,011 | 17.03 | 5,148               | 16.08 | 4,808               | 18.59 | 4,136              | 15.64 |
| Neck/back symptom/complaint    | L01, L02, L03           | 44,851 | 23.87 | 12,446              | 27.75 | 8,342               | 23.27 | 7,633              | 20.90 |
| Abdominal pain/cramps general  | D01                     | 36,242 | 19.29 | 6,878               | 18.98 | 5,427               | 18.73 | 4,809              | 16.17 |
| Fractures                      | L72, L73, L74, L75, L76 | 10,641 | 5.66  | 764                 | 7.18  | 694                 | 8.01  | 556                | 6.40  |
| Acne                           | S96                     | 7,721  | 4.11  | 326                 | 4.22  | 638                 | 10.00 | 356                | 5.53  |
| Injury musculoskeletal         | L81                     | 12,271 | 6.53  | 1,094               | 8.92  | 911                 | 9.16  | 800                | 7.96  |
| Asthma                         | R96                     | 11,415 | 6.07  | 800                 | 7.01  | 1,069               | 11.51 | 598                | 6.35  |
| Allergic rhinitis              | R97                     | 23,335 | 12.42 | 3,224               | 13.82 | 3,447               | 17.81 | 2,222              | 11.38 |
| Laceration/cut                 | S18                     | 15,377 | 8.18  | 1,388               | 9.03  | 1,299               | 10.15 | 1,152              | 9.11  |
| Naevus/mole                    | S82                     | 29,454 | 15.67 | 5,030               | 17.08 | 4,535               | 18.26 | 3,614              | 14.47 |



**Supplemental Table S3.** Correlations between relatives in educational outcomes and 10 mental and 10 somatic health conditions measured cross-sectionally in 2015-2019, including 95% confidence intervals, along with tests of deviations from direct assortment. Adjusted for sex and year of birth.

| Variable               | r(partner)        | r(sibling)        | r(inlaw)            | Inlaw inf. | Deviation from direct assortment, p-value |
|------------------------|-------------------|-------------------|---------------------|------------|-------------------------------------------|
| Grade point average    | 0.42 [0.42, 0.43] | 0.52 [0.52, 0.53] | 0.29 [0.29, 0.30]   | 1.33       | <1.00e-99                                 |
| Educational attainment | 0.48 [0.47, 0.48] | 0.40 [0.40, 0.40] | 0.29 [0.28, 0.29]   | 1.50       | <1.00e-99                                 |
| Depressive disorder    | 0.25 [0.23, 0.27] | 0.17 [0.16, 0.19] | 0.07 [0.05, 0.08]   | 1.57       | 3.39e-04                                  |
| Anxiety disorder       | 0.17 [0.14, 0.20] | 0.18 [0.16, 0.20] | 0.05 [0.02, 0.07]   | 1.53       | 0.200                                     |
| Phobias                | 0.14 [0.09, 0.18] | 0.13 [0.10, 0.17] | 0.07 [0.03, 0.11]   | 3.68       | 0.015                                     |
| PTSD                   | 0.25 [0.23, 0.26] | 0.19 [0.18, 0.20] | 0.06 [0.05, 0.08]   | 1.36       | 0.012                                     |
| Sleep problems         | 0.17 [0.15, 0.19] | 0.13 [0.11, 0.14] | 0.05 [0.03, 0.06]   | 2.26       | 0.001                                     |
| Alcohol use disorder   | 0.28 [0.23, 0.33] | 0.20 [0.15, 0.24] | 0.11 [0.07, 0.16]   | 2.09       | 0.012                                     |
| Substance use disorder | 0.67 [0.65, 0.70] | 0.32 [0.29, 0.36] | 0.27 [0.24, 0.31]   | 1.25       | 0.003                                     |
| ADHD                   | 0.33 [0.30, 0.36] | 0.38 [0.36, 0.40] | 0.13 [0.10, 0.16]   | 1.03       | 0.805                                     |
| Psychotic disorders    | 0.25 [0.19, 0.31] | 0.23 [0.19, 0.27] | 0.02 [-0.04, 0.07]  | 0.31       | 0.171                                     |
| Personality disorder   | 0.24 [0.17, 0.30] | 0.24 [0.19, 0.29] | 0.10 [0.05, 0.16]   | 1.83       | 0.145                                     |
| Headaches              | 0.06 [0.04, 0.07] | 0.11 [0.10, 0.12] | 0.03 [0.01, 0.04]   | 3.95       | 0.002                                     |
| Neck/back              | 0.12 [0.11, 0.13] | 0.11 [0.10, 0.12] | 0.05 [0.04, 0.06]   | 3.35       | 4.29e-10                                  |
| Abdominal pain         | 0.09 [0.07, 0.10] | 0.09 [0.08, 0.10] | 0.02 [0.01, 0.03]   | 2.97       | 0.009                                     |
| Fractures              | 0.07 [0.04, 0.10] | 0.08 [0.06, 0.10] | 0.02 [-0.00, 0.04]  | 2.70       | 0.350                                     |
| Acne                   | 0.04 [0.01, 0.08] | 0.16 [0.14, 0.19] | 0.02 [-0.01, 0.05]  | 2.95       | 0.305                                     |
| Injury musculoskeletal | 0.09 [0.07, 0.12] | 0.08 [0.07, 0.10] | 0.04 [0.02, 0.06]   | 4.71       | 0.002                                     |
| Asthma                 | 0.04 [0.01, 0.06] | 0.19 [0.18, 0.21] | 0.02 [-0.00, 0.04]  | 2.67       | 0.230                                     |
| Allergic rhinitis      | 0.04 [0.02, 0.06] | 0.18 [0.17, 0.19] | -0.00 [-0.01, 0.01] | -0.07      | 0.267                                     |
| Laceration/cut         | 0.06 [0.04, 0.08] | 0.08 [0.06, 0.09] | 0.04 [0.02, 0.05]   | 7.79       | 1.27e-04                                  |
| Naevus/mole            | 0.07 [0.06, 0.09] | 0.13 [0.11, 0.14] | 0.01 [0.00, 0.03]   | 1.58       | 0.384                                     |

Note: The p-value arises from comparing a constrained model, where in-law correlation is the product of partner and sibling correlations, to an unconstrained model with independent estimates for each relationship type. A low p-value signifies a poor fit for direct assortment.

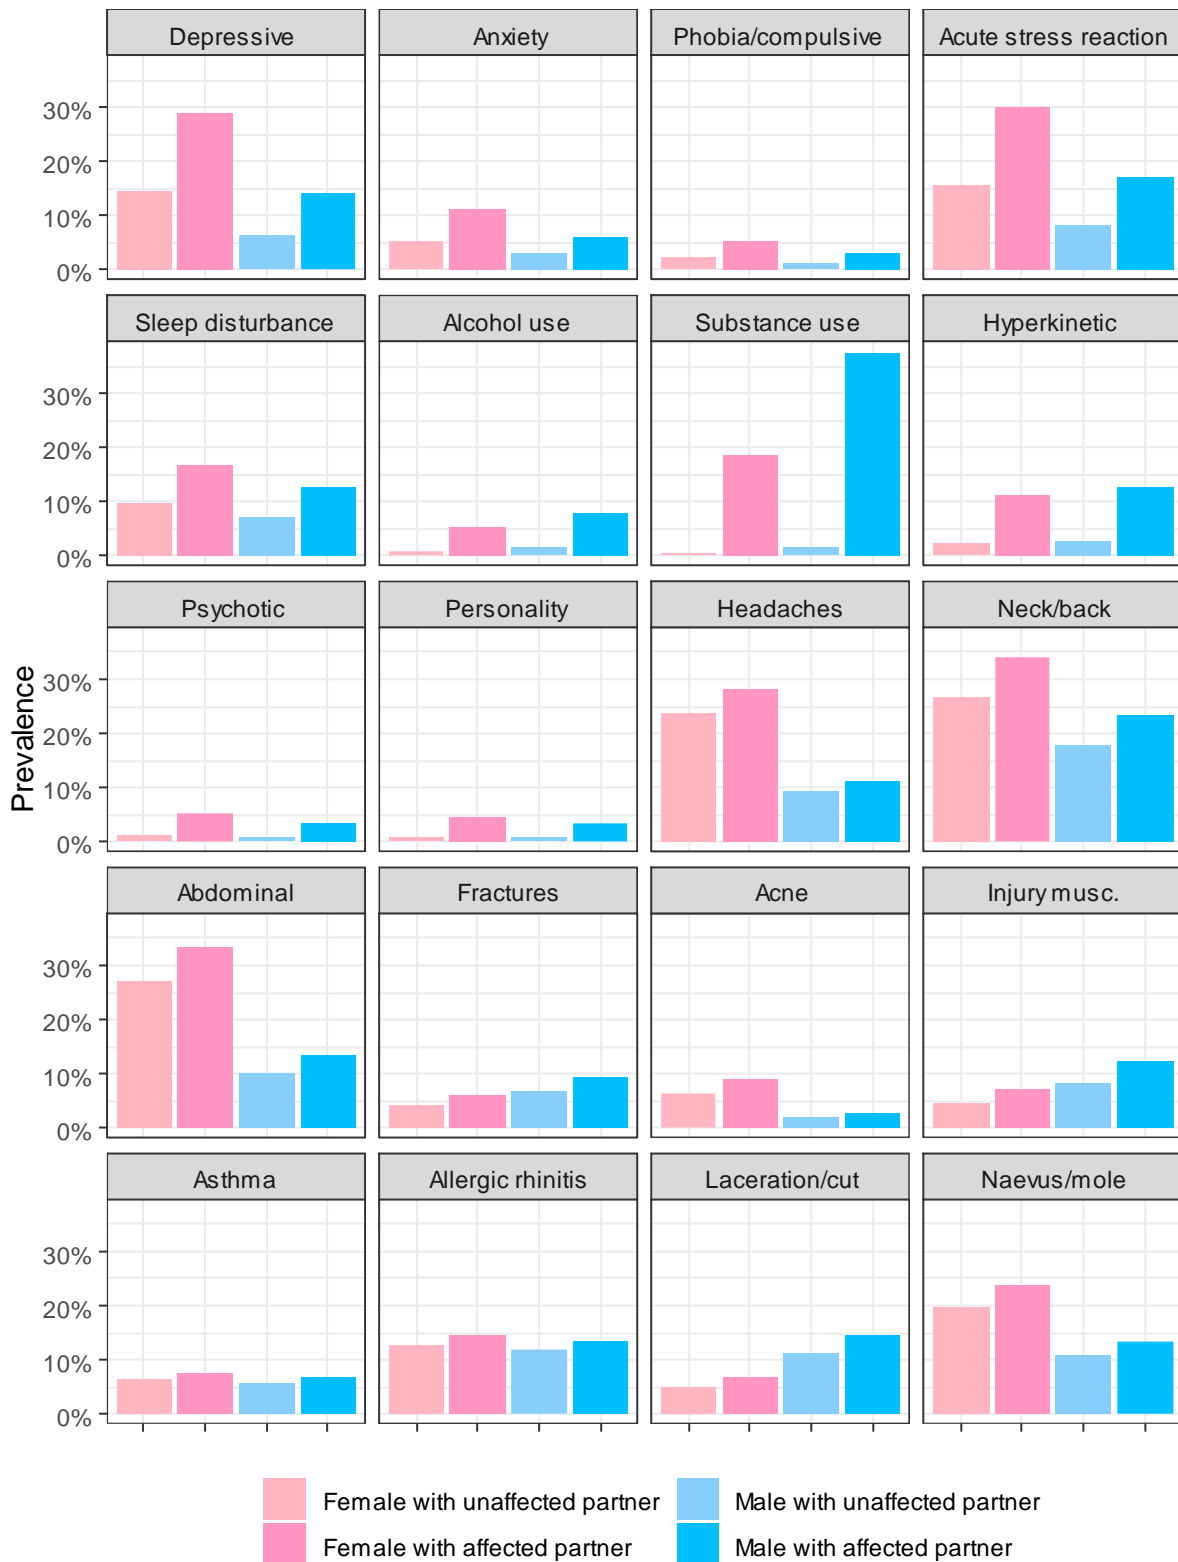

**Supplemental Figure S6.** Prevalence of 10 mental and 10 somatic health conditions among males and females with unaffected and affected partners, measured cross sectionally in 2015-2019.

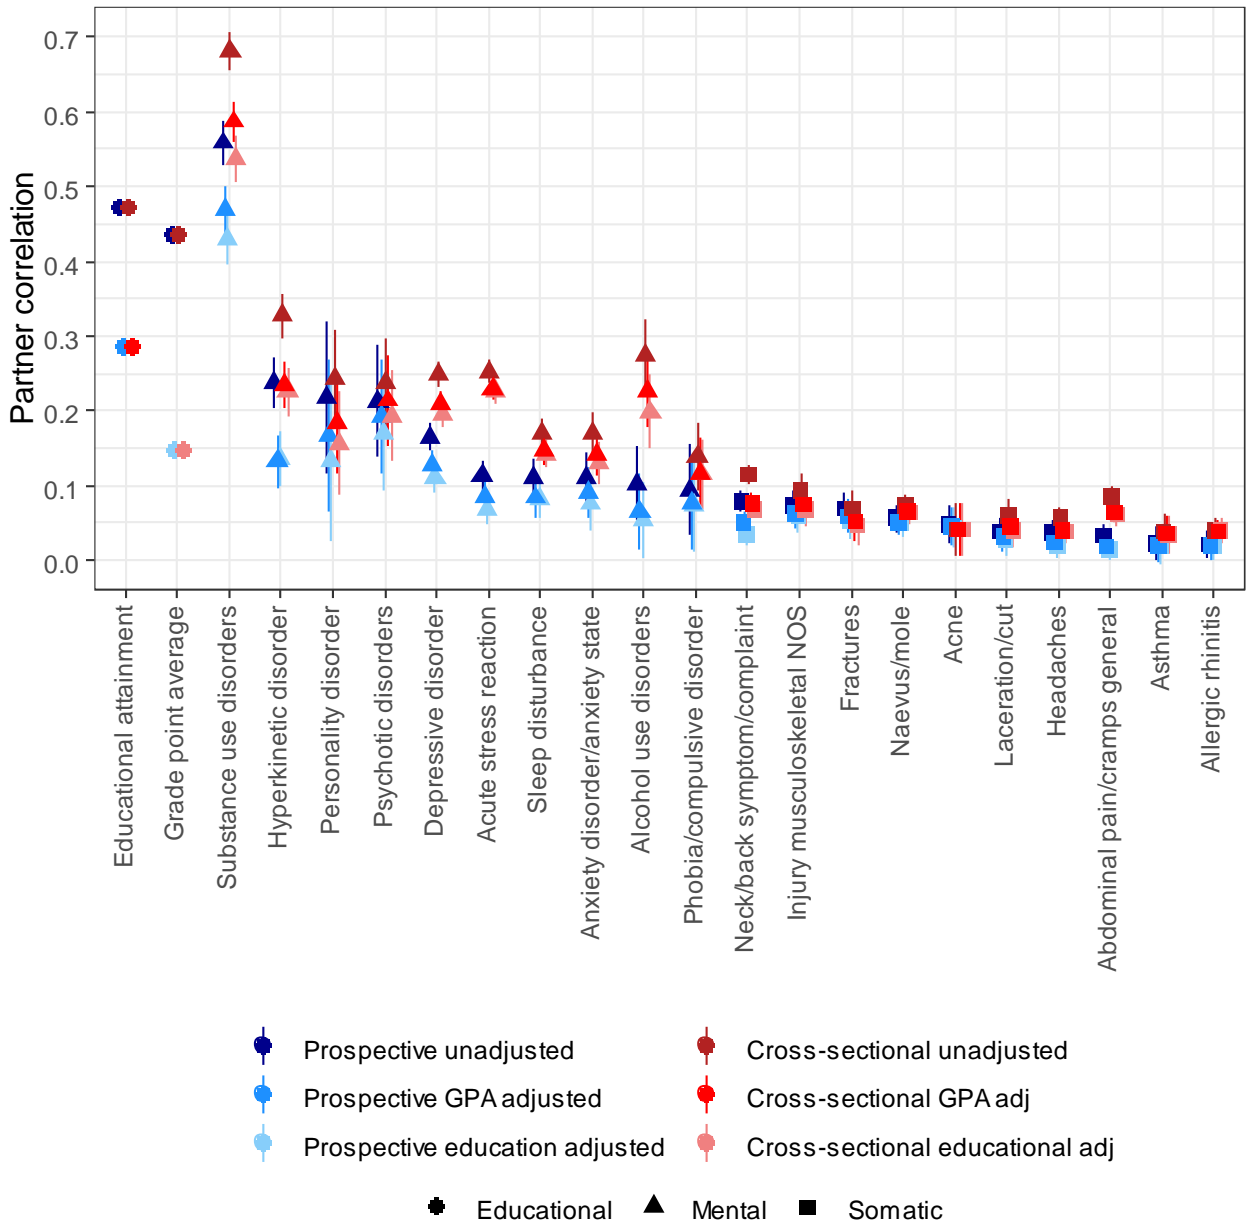

**Supplemental Figure S7.** Correlations between female and male partners for educational outcomes and 10 mental health and 10 somatic health phenotypes 10 to 5 years before they had their first child and cross-sectionally in 2015-2019. Including adjustment for educational attainment and grade point average in both assessments.

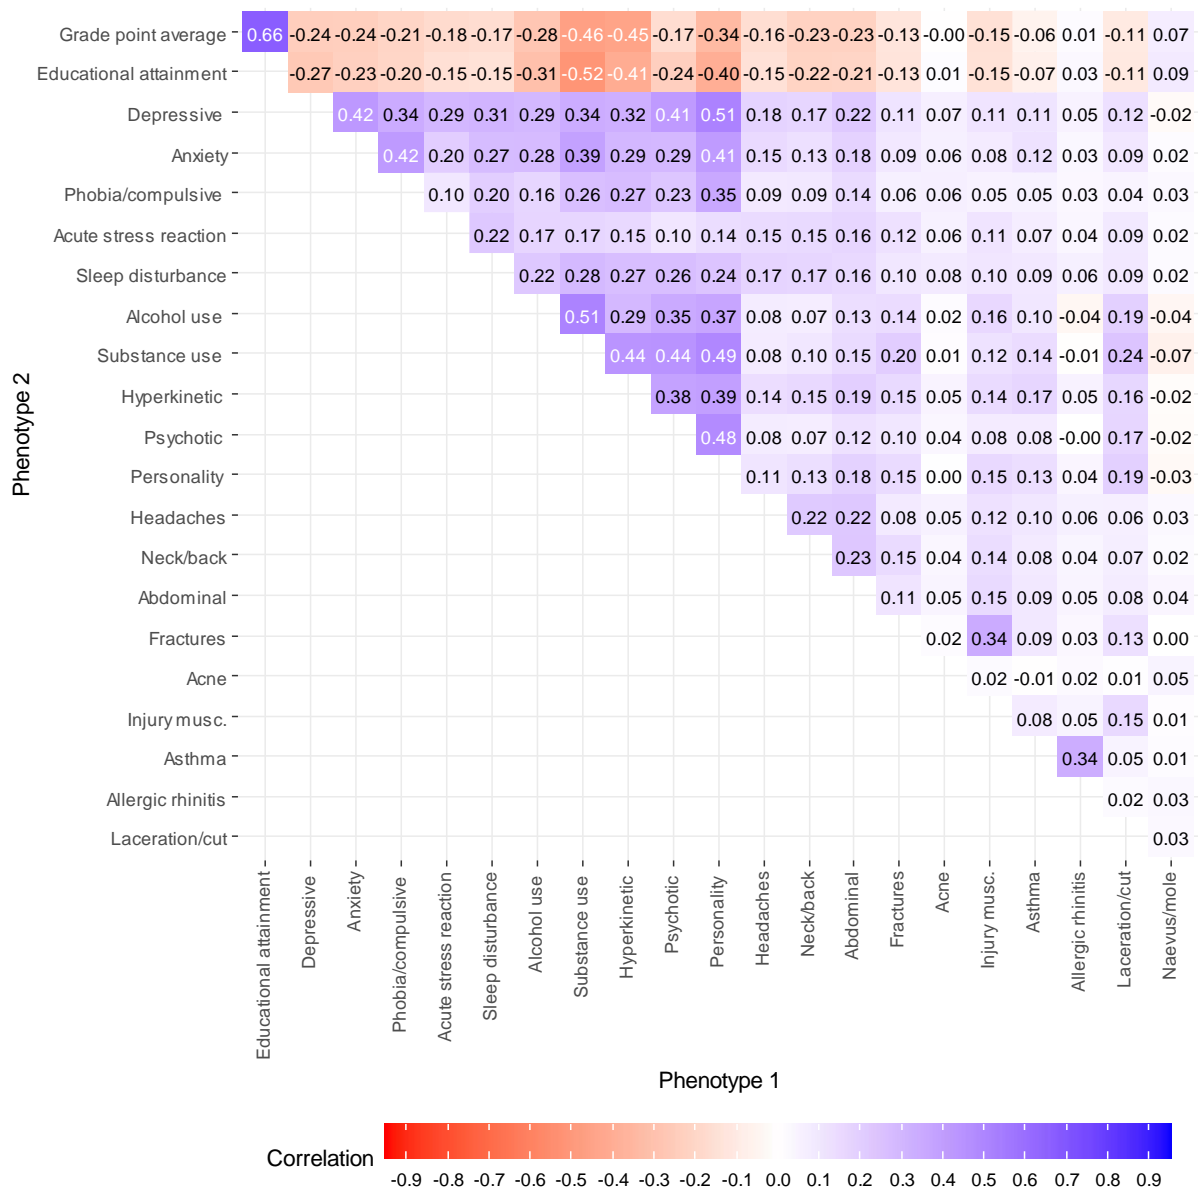

**Supplemental Figure S8.** Within person correlations for educational outcomes, 10 mental health conditions, and 10 somatic health conditions, measured cross sectionally in 2015-2019. Adjusted for age and sex.

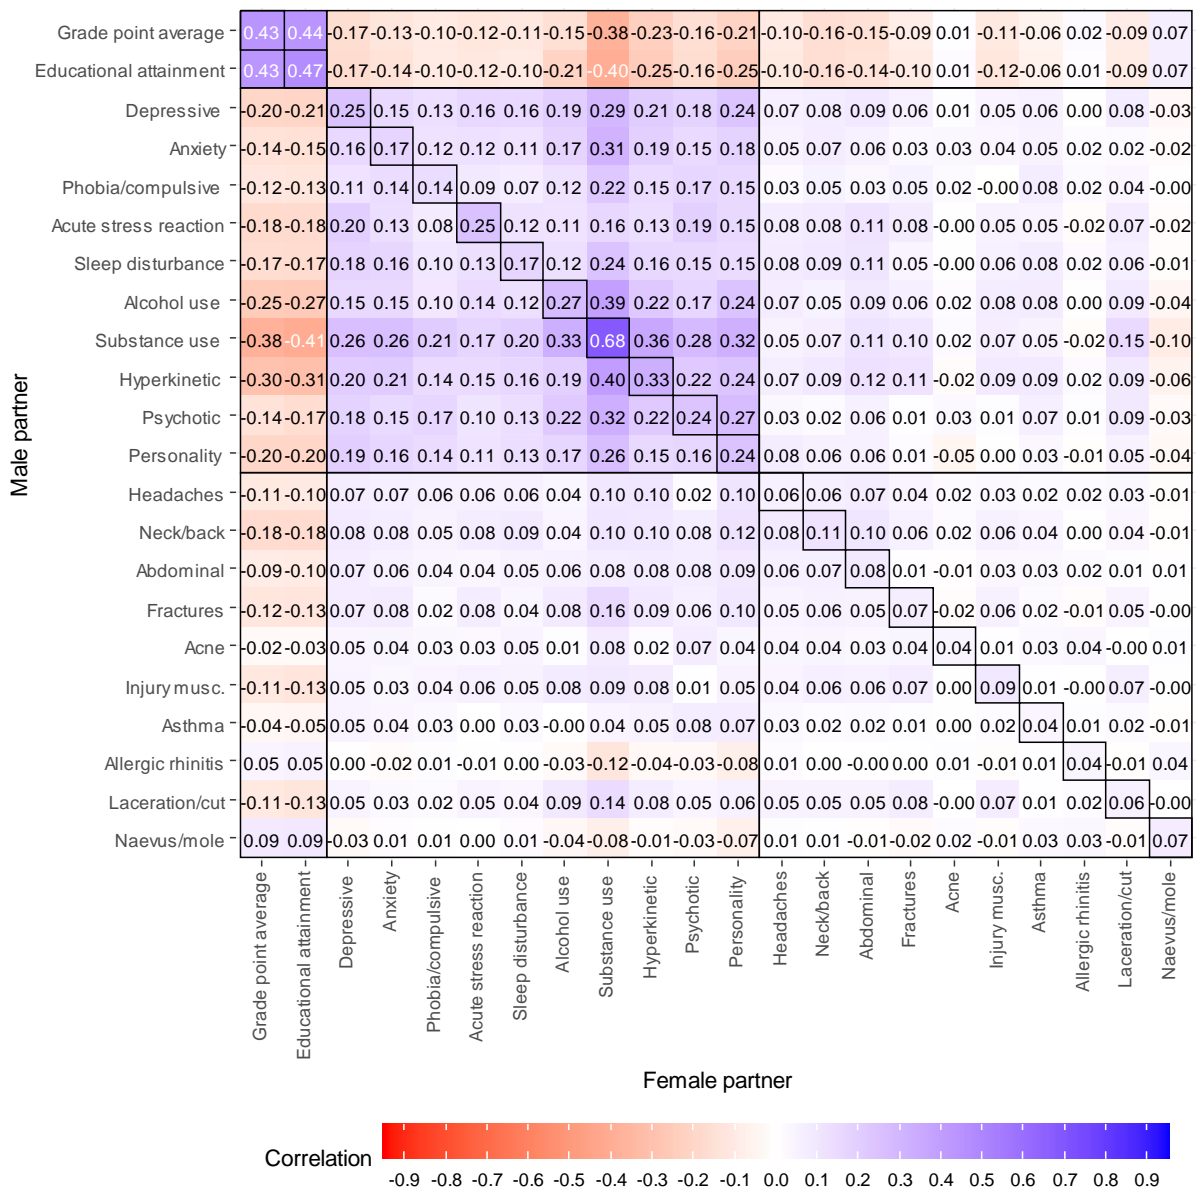

**Supplementary Figure S9.** Within and across-trait partner correlations for educational outcomes, 10 mental health conditions, and 10 somatic health conditions, measured cross sectionally in 2015-2019. Adjusted for age.

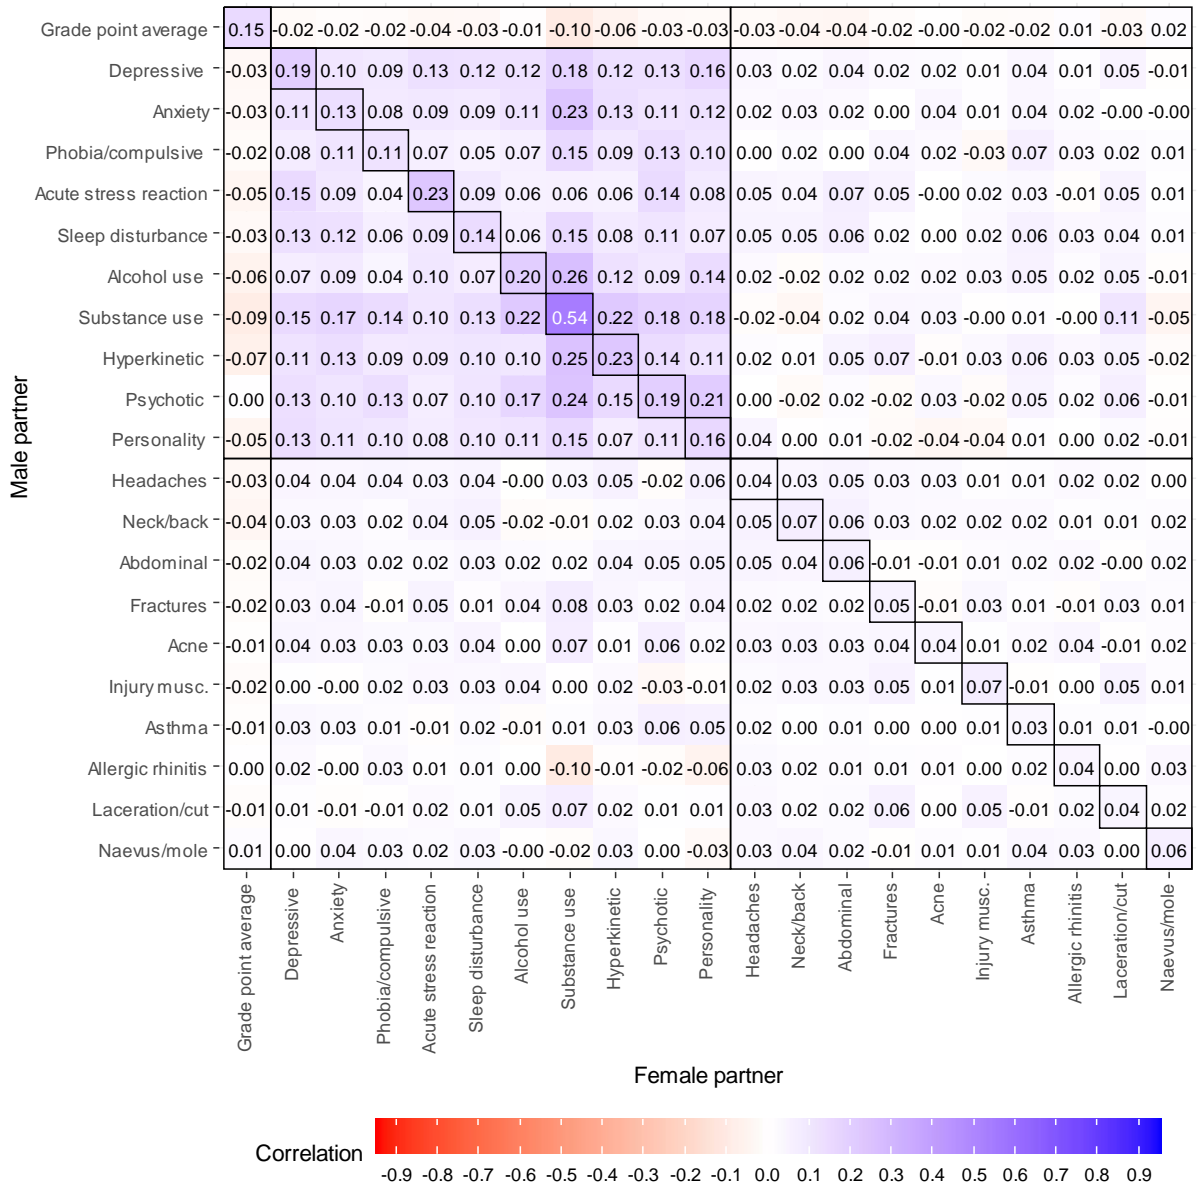

**Supplementary Figure S10.** Within and across-trait partner correlations for 10 mental health conditions, and 10 somatic health conditions, measured cross sectionally in 2015-2019. Adjusted for age and educational attainment.

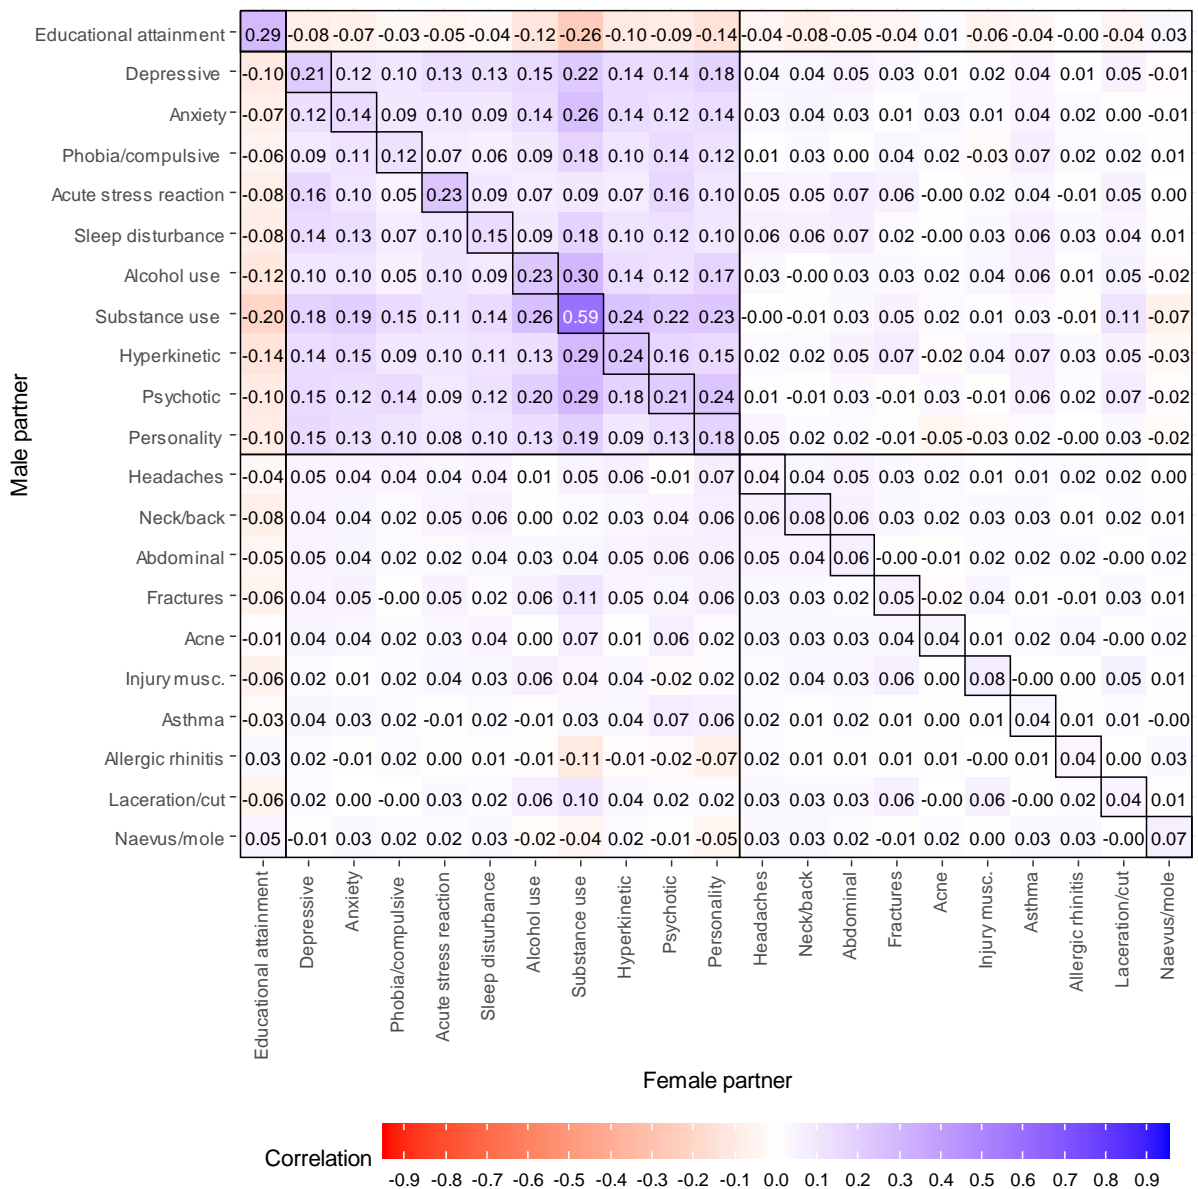

**Supplementary Figure S11.** Within and across-trait partner correlations for 10 mental health conditions, and 10 somatic health conditions, measured cross sectionally in 2015-2019. Adjusted for age and grade point average attainment.

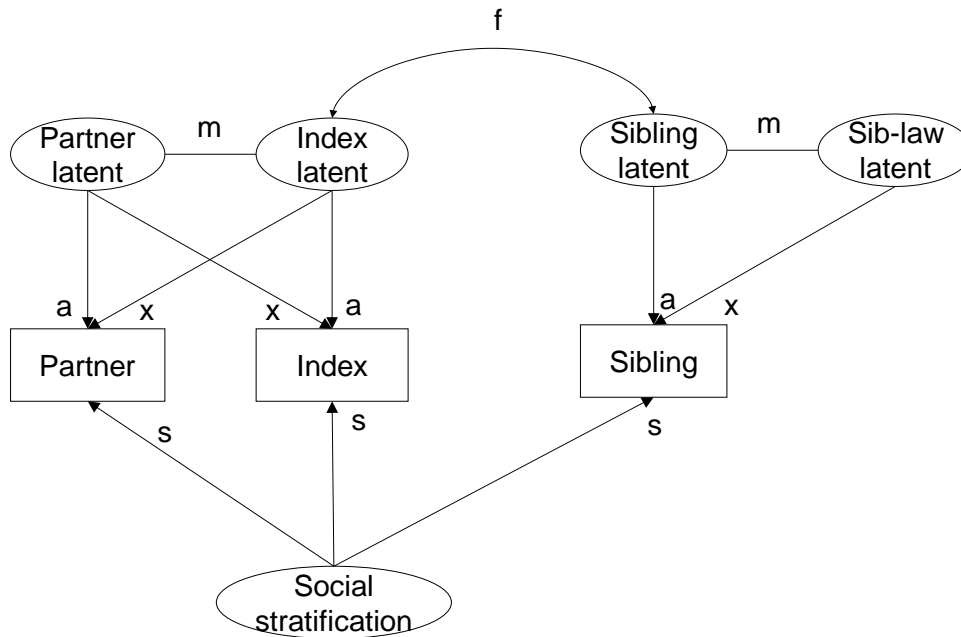

**Supplemental Figure S12.** The correlation between observed phenotypes (squares) can be derived by path tracing rules allowing for copaths, so that e.g.,  $r_{\text{partner}} = a^2m^2 + x^2m^2 + a^2x^2 + s^2$ ;  $r_{\text{sibling}} = a^2f^2 + x^2m^2f^2 + s^2$ ;  $r_{\text{inlaw}} = a^2m^2f^2 + x^2f^2 + s^2 + a^2m^2f^2m^2x + x^2f^2m^2x$ , and the inlaw inflation factor =  $r_{\text{inlaw}} / (r_{\text{partner}} * r_{\text{sibling}})$ . With direct assortment,  $a=1$ ,  $x=0$ , and  $s=0$ , this recedes to  $r_{\text{partner}} = m$ ,  $r_{\text{sibling}} = f$ ,  $r_{\text{inlaw}} = m*f$ , and the inlaw inflation factor =  $r_{\text{inlaw}} / (r_{\text{partner}} * r_{\text{sibling}}) = m*f / (m*f) = 1$ . With indirect assortment ( $a < 1$ ; assuming  $x=0$ ;  $s=0$ ), one would expect all correlations between individuals' phenotypes to be deflated by the same degree; the in-laws correlation as much as the partner correlation and the sibling correlation. If  $a$  is the correlation between the assorted variable and the observed variable, then  $r_{\text{partner}} = ma^2$  and  $r_{\text{sibling}} = fa^2$ . Then  $r_{\text{inlaw}} = mra^2$  would be higher than the product  $r_{\text{partner}} * r_{\text{sibling}} = ma^2fa^2$ . Hence, the in-law correlation – which is deflated once – should be larger than the product of the sibling and the partner correlations – which are deflated one time each. Note that measurement error is one example of indirect assortment – people assort on some true value, although what we observe is the phenotype with measurement error. Hence, with indirect assortment, one expects the in-law inflation factor to be above 1. With social homogamy ( $s > 0$ ; assuming  $x=0$ ), the strength of the social homogamy is added to the correlations between all relatives, so that the observed  $r_{\text{partner}} = a^2m + s^2$ ,  $r_{\text{sibling}} = a^2f + s^2$ , and  $r_{\text{inlaw}} = a^2mf + s^2$ . This typically leads to in-law inflation factor above 1.00, although in cases with implausibly high phenotypic resemblance ( $m+f+s^2 > 1$ ), the in-law inflation factor can be less than 1.00. With convergence ( $x > 0$ ), the partner correlation would share variation that does not influence correlations with siblings and inlaws as much. If  $x$  is the degree of convergence,  $r_{\text{partner}} = a^2m + 2xa + x^2m + s^2$ ,  $r_{\text{sibling}} = a^2f + xmf + s^2$ , and  $r_{\text{inlaw}} = a^2mf + xfa(1+m^2) + x^2fm + s^2$ . All else being equal,  $x > 0$  leads to an in-law inflation factor less than 1.00.



```

library(polycor)

# dichotomized normally distributed variables
n = 10000
vc = morm(n)
va = vc+rnorm(n)
vb = vc+rnorm(n)

va_dich = ifelse(va<2,0,1)
vb_dich = ifelse(vb<2,0,1)

# pearson correlation between original variables
cor(va,vb)

# pearson correlation between dichotomized variables (underestimated)
cor(va_dich, vb_dich)

# polychoric correlation between dichotomized variables (correct)
polychor(va_dich,vb_dich)

# dichotomized skewed variables
n = 100000
vc = morm(n)
va = (vc+morm(n))^2
vb = (vc+rnorm(n))^2

hist(va)

va_dich = ifelse(va<5,0,1)
vb_dich = ifelse(vb<5,0,1)

# pearson correlation between original variables
cor(va,vb)

# pearson correlation between dichotomized variables
cor(va_dich, vb_dich)

# polychoric correlation between dichotomized variables (overestimated)
polychor(va_dich,vb_dich)

```

**Supplemental Script S1.** Tetrachoric correlations for skewed variables. Tetrachoric correlations get overestimated when based on non-normal variables.

```

library(tidyverse)
library(polycor)

(randvar=runif(1))

# normally distributed variables

n = 100000
common1 = rnorm(n)
person_i = common1 + rnorm(n)*randvar # index
person_ip = common1 + rnorm(n)*randvar # index' partner
person_ips = person_ip/2 + rnorm(n)*randvar # index' partner's sibling (inlaw)

# correlation matrix
cor(tibble(person_i, person_ip, person_ips))

# observed correlations between indirectly associated variables (e.g. between in-laws)
cor(person_i, person_ips)

# observed product of correlations (matches the expectation)
cor(person_i, person_ip)*cor(person_ip, person_ips)

# skewed variables
person_i2 = person_i^2
person_ip2 = person_ip^2
person_ips2 = person_ips^2

# correlation matrix
cor(tibble(person_i2, person_ip2, person_ips2))

# observed correlations between indirectly associated variables (e.g. between in-laws)
cor(person_i2, person_ips2)

# observed product of correlations (still matches the expectation)
cor(person_i2, person_ip2)*cor(person_ip2, person_ips2)

# dichotomized skewed variables
threshold=3
person_i2_dich = ifelse(person_i2<threshold,0,1)
person_ip2_dich = ifelse(person_ip2<threshold,0,1)
person_ips2_dich = ifelse(person_ips2<threshold,0,1)

# correlation matrix
cor(tibble(person_i2_dich, person_ip2_dich, person_ips2_dich))

# observed pearson correlations between indirectly associated variables (e.g. between in-laws)
cor(person_i2_dich, person_ips2_dich)

# observed product of pearson correlations (lower than the expectation)
cor(person_i2_dich, person_ip2_dich)*cor(person_ip2_dich, person_ips2_dich)

# observed polychoric correlations between indirectly associated variables (e.g. between in-laws)
polychor(person_i2_dich, person_ips2_dich)

# observed product of polychoric correlations (matches the expectation again)
polychor(person_i2_dich, person_ip2_dich)*polychor(person_ip2_dich, person_ips2_dich)

```

**Supplemental Script S2.** The product of tetrachoric correlations for skewed variables. This script shows that if the product of two Pearson correlations matches with a third correlation, this is also the case for tetrachoric correlations after dichotomization, even if the underlying variables are skewed.
